# Supplementary material for: Losartan and dapagliflozin combination therapy in reducing uric acid level compared to monotherapy in patients with heart failure
Source: PeerJ. 2024 Nov 29;12:e18595. doi: 10.7717/peerj.18595 (PMC11610471; doi:10.7717/peerj.18595)
Supplement: Supplemental Information 1 [file peerj-12-18595-s001.xlsx]

## Sheet: SGGLT2ivschung_Final
No.	Age	Sex	Systolic blood pressure	Diastolic blood pressure	BMI	Waist circumference	NYHA	Hypertension	T2DM	History of myocardial infarction	History of stroke	Smoking	Alcohol use	dyslipidemia	EF	Chol	Tri	LDL	HDL	aciduric1	aciduric2	losartan	sglt2	both	med_gr	MeanDif	PerChange	EndPoint	TeritleUric	age>60	NYHAIII	EF<40	GrBMI>23
1	45	1	130	80	22.21	85	1	1	2	2	1	2	1	1	26	2.3	1	0.6	1.5	569	234	1	0	0	1	-335	58.8752	1	2	2	2	1	2
2	63	2	90	60	15.63	72	2	1	2	1	2	2	2	1	55	4	0.6	0.9	2.9	739	324	0	1	0	2	-415	56.157	1	3	1	2	2	2
3	52	1	110	60	19.53	70	2	1	2	2	2	1	1	1	30	4.6	1.1	1	3.3	547	256	1	0	0	1	-291	53.1993	1	2	2	2	1	2
4	61	1	139	60	21.26	85	1	1	2	2	2	1	1	1	36	4.4	3.4	1	2.7	397	126	1	0	0	1	-271	68.262	1	1	1	2	1	2
5	69	2	90	60	17.19	60	2	2	2	2	2	2	2	2	50	2.9	0.5	1.1	1.9	692	368	0	1	0	2	-324	46.8208	2	3	1	2	2	2
6	76	1	110	70	21.01	82	2	1	1	1	1	1	1	1	18	3.5	1.3	1	2.1	432	211	0	1	0	2	-221	51.1574	1	1	1	2	1	2
7	71	1	120	70	19.53	71	1	2	2	2	2	1	1	2	38	3.8	1.1	1.1	2.3	437	279	1	0	0	1	-158	36.1556	1	1	1	2	1	2
8	90	2	120	70	20.28	70	1	1	2	1	2	2	2	1	35	2.7	1.4	0.6	1.8	531	312	0	1	0	2	-219	41.2429	1	2	1	2	1	2
9	44	1	90	60	19.1	80	2	1	2	2	1	1	2	1	40	4	2	0.6	2.7	623	317	0	1	0	2	-306	49.1172	1	3	2	2	2	2
10	76	2	130	80	20.31	78	2	1	2	1	1	2	2	1	38	3.5	1	0.9	2.3	414	297	1	0	0	1	-117	28.2609	1	1	1	2	1	2
11	60	1	100	60	21.45	79	2	1	1	2	1	1	1	1	40	3.9	1.2	0.5	2.8	512	237	0	1	0	2	-275	53.7109	1	2	1	2	2	2
12	83	1	100	60	22.86	80	1	1	1	2	2	1	1	1	48	2.3	0.7	0.9	1.2	631	217	1	0	0	1	-414	65.6101	1	3	1	2	2	2
13	70	1	130	89	19.84	80	1	1	2	1	1	1	1	1	42	3	0.6	0.9	1.9	521	320	1	0	0	1	-201	38.5797	1	2	1	2	2	2
14	64	2	120	80	18.49	70	2	1	2	1	1	2	2	1	36	4.4	4.8	1.6	2.7	456	129	0	1	0	2	-327	71.7105	1	2	1	2	1	2
15	75	2	120	60	19.14	70	2	1	1	2	2	2	2	1	36	5.2	1.2	1	3.7	486	225	1	0	0	1	-261	53.7037	1	2	1	2	1	2
16	81	2	80	40	19.63	68	1	1	2	1	2	2	2	1	56	4	1.4	1	2.6	512	317	0	1	0	2	-195	38.0859	1	2	1	2	2	2
17	49	1	130	89	22.49	75	3	1	2	1	1	2	1	1	47	3.1	1.2	0.6	2.1	489	232	1	0	0	1	-257	52.5562	1	2	2	1	2	2
18	94	1	110	70	21.34	80	3	1	2	1	1	1	1	1	56	4.8	1.2	1	3.2	728	326	0	1	0	2	-402	55.2198	1	3	1	1	2	2
19	89	1	120	80	19.26	78	1	1	2	1	1	1	1	1	32	5.6	0.9	1.5	3.5	624	378	1	0	0	1	-246	39.4231	1	3	1	2	1	2
20	65	2	110	70	19.78	72	2	1	1	2	2	2	2	2	44	2.8	0.7	1.2	1.6	589	321	0	1	0	2	-268	45.5008	1	2	1	2	2	2
21	88	2	120	80	19.23	72	1	1	1	2	2	2	2	1	45	3.7	1.1	0.7	2.4	468	232	1	0	0	1	-236	50.4274	1	2	1	2	2	2
22	81	1	130	80	19.1	72	2	1	2	2	2	1	1	1	42	5.5	1.6	0.8	3.7	621	398	0	1	0	2	-223	35.9098	1	3	1	2	2	2
23	85	2	120	80	17.78	70	1	1	2	1	1	2	2	1	40	5.3	3.7	0.6	3.3	546	221	1	0	0	1	-325	59.5238	1	2	1	2	2	2
24	78	2	120	70	20.83	78	1	1	2	2	1	2	2	1	37	5.4	1.7	1.1	3.8	502	379	0	1	0	2	-123	24.502	2	2	1	2	1	2
25	83	1	120	80	21.97	72	1	1	2	1	2	1	2	1	32	5.6	1.9	1.2	3.8	606	418	1	0	0	1	-188	31.0231	1	3	1	2	1	2
26	34	2	110	70	17.75	75	2	1	1	2	2	2	2	1	53	2.7	1	0.8	1.6	476	312	0	1	0	2	-164	34.4538	1	2	2	2	2	2
27	72	2	100	60	19.1	76	1	1	2	2	1	2	2	1	32	3.4	1.2	0.7	2.4	446	213	1	0	0	1	-233	52.2422	1	2	1	2	1	2
28	78	2	120	80	19.43	70	2	1	2	1	1	2	2	1	59	7.4	1.1	1.7	5.1	568	324	0	1	0	2	-244	42.9577	1	2	1	2	2	2
29	63	2	130	80	21.08	74	2	1	1	2	2	2	2	2	32	4.3	1.4	1.2	2.5	668	347	1	0	0	1	-321	48.0539	1	3	1	2	1	2
30	70	1	100	60	21.26	76	1	1	1	1	1	1	1	1	30	3.7	0.8	0.8	2.6	501	315	0	1	0	2	-186	37.1257	1	2	1	2	1	2
31	71	2	90	60	20.81	75	1	1	1	1	1	2	2	1	22	5.8	2.9	0.8	3.9	478	320	1	0	0	1	-158	33.0544	1	2	1	2	1	2
32	56	2	120	80	16.82	66	2	1	1	2	2	2	2	1	51	2.2	0.6	0.8	1.3	543	301	0	1	0	2	-242	44.5672	1	2	2	2	2	2
33	55	2	130	89	21.37	78	3	1	2	2	2	2	2	1	32	4.1	1.2	0.9	2.7	567	231	1	0	0	1	-336	59.2593	1	2	2	1	1	2
34	52	1	120	80	20.83	80	3	2	2	2	2	1	1	2	37	3.7	1.3	1.1	2.2	732	417	0	1	0	2	-315	43.0328	1	3	2	1	1	2
35	79	1	100	60	19.96	82	2	1	1	1	1	1	1	1	21	5.8	1.8	1.2	3.9	632	345	1	0	0	1	-287	45.4114	1	3	1	2	1	2
36	58	1	90	60	18.42	73	2	1	1	2	2	1	1	2	29	3.5	1.1	1.1	2.1	521	256	0	1	0	2	-265	50.8637	1	2	2	2	1	2
37	78	1	130	89	21.6	74	1	2	2	2	2	1	1	2	28	3.5	1.4	1.1	2.1	643	421	1	0	0	1	-222	34.5257	2	3	1	2	1	2
38	58	2	120	70	18.43	68	2	1	2	1	2	2	2	1	49	7.1	1.9	1.7	4.6	520	369	0	1	0	2	-151	29.0385	2	2	2	2	2	2
39	66	1	120	70	19.95	74	1	1	1	2	1	1	1	1	33	5.8	2.9	1.4	3.4	439	257	1	0	0	1	-182	41.4579	1	1	1	2	1	2
40	70	2	139	70	20.55	76	2	1	1	1	1	2	2	1	37	16.8	8.7	1.7	9	532	390	0	1	0	2	-142	26.6917	2	2	1	2	1	2
41	66	2	100	60	15.63	62	2	2	2	2	2	2	2	2	37	3.1	0.7	1.8	1.2	656	427	0	1	0	2	-229	34.9085	2	3	1	2	1	2
42	84	1	110	60	20.2	69	1	1	2	1	2	2	1	1	38	3.6	1	1	2.8	456	214	1	0	0	1	-242	53.0702	1	2	1	2	1	2
43	80	2	130	80	21.48	72	1	1	1	1	1	2	2	1	25	6.1	1.3	1.7	3.8	429	312	0	1	0	2	-117	27.2727	1	1	1	2	1	2
44	87	1	139	80	19.53	69	2	1	2	2	1	1	1	1	35	4.9	0.9	1.1	3	478	123	1	0	0	1	-355	74.2678	1	2	1	2	1	2
45	83	1	90	60	19.1	68	1	1	2	2	2	1	1	1	34	2.6	1	0.8	1.6	567	311	0	1	0	2	-256	45.1499	1	2	1	2	1	2
46	83	2	110	70	21.88	66	2	1	1	1	2	2	2	1	46	3.9	1.5	0.9	2.4	448	227	1	0	0	1	-221	49.3304	1	2	1	2	2	2
47	87	1	139	80	22.77	74	1	1	1	2	2	1	1	1	36	7.1	1.2	1.7	4.4	578	301	0	1	0	2	-277	47.9239	1	2	1	2	1	2
48	79	2	100	60	20.83	76	2	1	1	2	2	2	2	1	20	5.8	6.2	0.8	3.3	668	311	1	0	0	1	-357	53.4431	1	3	1	2	1	2
49	85	2	90	60	20.66	70	1	1	1	1	1	2	2	1	35	4.2	0.7	1.1	2.7	456	123	0	1	0	2	-333	73.0263	1	2	1	2	1	2
50	79	1	110	70	21.08	72	2	1	1	1	1	1	1	1	29	4.4	2.9	1	2.7	732	321	1	0	0	1	-411	56.1475	1	3	1	2	1	2
51	84	1	90	60	21.97	75	2	1	1	2	2	1	1	1	58	4.1	2	0.6	2.8	689	314	0	1	0	2	-375	54.4267	1	3	1	2	2	2
52	76	1	130	89	17.58	72	1	1	1	1	1	1	1	1	40	4.6	1.9	0.9	3.3	521	412	1	0	0	1	-109	20.9213	1	2	1	2	2	2
53	57	1	110	80	20.06	80	2	1	1	1	1	1	1	1	42	4.3	1.4	1	2.7	505	300	0	1	0	2	-205	40.5941	1	2	2	2	2	2
54	81	2	139	80	19.72	69	2	1	2	2	2	2	2	1	40	5.6	1.3	1.2	3.7	603	421	1	0	0	1	-182	30.1824	2	3	1	2	2	2
55	86	2	130	80	19.38	74	1	1	1	2	1	2	2	1	30	6.3	2.2	1.3	4.2	667	310	1	0	0	1	-357	53.5232	1	3	1	2	1	2
56	49	1	110	70	22.86	81	1	1	1	1	2	1	1	1	34	2.6	1.2	0.6	1.7	487	211	0	1	0	2	-276	56.6735	1	2	2	2	1	2
57	57	2	110	60	19.14	69	2	1	1	2	2	2	2	1	42	3	1.5	0.8	1.7	587	213	0	1	0	2	-374	63.7138	1	2	2	2	2	2
58	54	2	100	60	18.29	70	2	1	2	2	2	2	2	1	36	4.2	1.7	1.2	2.7	643	323	1	0	0	1	-320	49.7667	1	3	2	2	1	2
59	81	2	130	80	19.38	78	1	1	1	2	2	2	2	1	28	3.9	1.5	1	2.7	632	418	0	1	0	2	-214	33.8608	2	3	1	2	1	2
60	62	1	130	80	20.55	84	2	1	1	2	2	1	2	1	42	4.7	1.3	1	3.3	542	243	1	0	0	1	-299	55.1661	1	2	1	2	2	2
61	43	1	100	70	22.1	76	1	1	1	1	1	1	1	1	21	3.9	1.7	0.9	2.3	603	216	0	1	0	2	-387	64.1791	1	3	2	2	1	2
62	45	2	139	80	20.31	76	1	2	2	2	2	2	2	2	61	3.5	1.1	1.2	2	779	412	1	0	0	1	-367	47.1117	2	3	2	2	2	2
63	56	2	120	80	20.06	70	2	1	1	2	2	2	2	1	36	6.4	2.5	1.2	4.2	678	324	0	1	0	2	-354	52.2124	1	3	2	2	1	2
64	62	1	110	60	21.05	78	1	1	1	2	2	1	1	1	47	3.8	1.2	1	2.6	567	205	1	0	0	1	-362	63.8448	1	2	1	2	2	2
65	60	2	100	60	15.23	63	2	1	1	1	2	2	2	1	46	2.4	0.7	0.7	1.7	654	427	1	0	0	1	-227	34.7095	2	3	1	2	2	2
66	75	2	130	80	22.03	78	1	1	2	2	1	2	2	1	48	4.3	2.1	0.8	2.7	594	215	1	0	0	1	-379	63.8047	1	2	1	2	2	2
67	61	2	95	60	20.83	76	2	1	2	1	1	2	2	1	42	5	1.6	1.3	3	517	239	0	1	0	2	-278	53.7718	1	2	1	2	2	2
68	79	2	120	70	19.92	74	1	1	2	2	2	2	2	1	37	3.7	3.1	1	2	502	317	0	1	0	2	-185	36.8526	1	2	1	2	1	2
69	84	1	120	70	15.43	68	2	1	1	2	2	2	1	1	32	5.6	1.3	1.3	3.6	678	317	1	0	0	1	-361	53.2448	1	3	1	2	1	2
70	66	1	100	60	19.49	81	2	1	1	2	2	1	1	1	32	4.2	1.7	1	2.7	653	312	0	1	0	2	-341	52.2205	1	3	1	2	1	2
71	91	2	100	60	19.15	70	2	1	1	1	1	2	2	1	25	2.7	0.8	1	1.5	507	319	1	0	0	1	-188	37.0809	1	2	1	2	1	2
72	58	2	110	60	20.57	78	1	1	2	2	2	2	2	1	51	2.3	1.5	0.7	1.3	586	321	0	1	0	2	-265	45.2218	1	2	2	2	2	2
73	49	1	100	60	21.26	74	1	1	2	2	2	1	1	1	31	5.2	4.1	0.9	3.3	653	341	0	1	0	2	-312	47.7795	1	3	2	2	1	2
74	58	1	130	80	21.01	76	2	1	1	2	1	1	1	1	18	3.4	1	0.8	2	485	211	1	0	0	1	-274	56.4948	1	2	2	2	1	2
75	71	1	100	60	18.99	71	1	1	2	1	2	1	1	1	58	4.7	1.7	1	3	465	237	1	0	0	1	-228	49.0323	1	2	1	2	2	2
76	81	2	139	80	19.78	71	2	1	2	2	2	2	2	1	38	2.6	0.8	0.8	1.6	521	259	0	1	0	2	-262	50.2879	1	2	1	2	1	2
77	75	2	130	89	21.09	78	1	1	2	2	2	2	2	1	36	7	2.2	1.2	4.8	504	297	1	0	0	1	-207	41.0714	1	2	1	2	1	2
78	85	1	100	60	19.63	69	2	1	1	2	2	1	1	2	24	3.5	0.9	1.1	2	543	247	1	0	0	1	-296	54.512	1	2	1	2	1	2
79	84	1	139	80	19.47	80	1	1	1	2	2	1	1	2	44	2.9	0.9	1.2	1.4	654	346	0	1	0	2	-308	47.0948	1	3	1	2	2	2
80	70	1	80	40	18.78	70	2	1	1	1	1	1	1	1	36	3	1.1	0.9	1.9	641	395	0	1	0	2	-246	38.3775	1	3	1	2	1	2
81	69	1	139	89	19.81	72	1	1	1	1	1	1	1	1	31	2.5	1.1	0.8	1.5	565	320	1	0	0	1	-245	43.3628	1	2	1	2	1	2
82	25	2	110	70	18	68	1	1	1	1	1	2	2	1	33	4.4	3.6	0.9	2.7	490	231	0	1	0	2	-259	52.8571	1	2	2	2	1	2
83	90	2	139	89	19.57	75	2	1	1	2	2	2	2	2	40	4.1	1.2	1.2	2.4	543	221	0	1	0	2	-322	59.3002	1	2	1	2	2	2
84	62	1	90	60	20.32	81	1	1	1	1	1	1	2	1	37	2	0.8	0.6	1.1	497	310	1	0	0	1	-187	37.6258	1	2	1	2	1	2
85	59	1	130	80	18.78	72	1	1	1	1	1	1	1	1	20	4.8	4.6	0.9	2.8	501	312	1	0	0	1	-189	37.7246	1	2	2	2	1	2
86	88	2	120	60	18.9	69	2	1	1	1	1	2	2	1	37	4.3	1.2	1.2	2.6	547	341	1	0	0	1	-206	37.66	1	2	1	2	1	2
87	68	1	120	80	20.45	74	2	1	1	2	2	1	1	2	26	4.2	1.6	1.1	2.5	654	314	0	1	0	2	-340	51.9878	1	3	1	2	1	2
88	75	1	100	60	17.97	74	2	1	1	2	2	1	1	2	26	3.4	1.1	1.1	1.8	578	232	1	0	0	1	-346	59.8616	1	2	1	2	1	2
89	48	2	120	80	22.1	78	2	1	1	2	2	2	2	1	17	4.6	3.4	0.7	2.9	486	212	0	1	0	2	-274	56.3786	1	2	2	2	1	2
90	85	2	130	70	19.14	73	2	1	1	2	2	2	2	2	36	3.7	1.1	1.1	2.2	543	309	0	1	0	2	-234	43.0939	1	2	1	2	1	2
91	77	2	139	80	19.38	75	1	1	2	1	1	2	2	1	48	6.2	1.8	1.1	4.1	490	311	1	0	0	1	-179	36.5306	1	2	1	2	2	2
92	88	2	130	80	20.06	77	1	1	1	1	1	2	2	1	58	3.9	1	1	2.5	532	299	0	1	0	2	-233	43.797	1	2	1	2	2	2
93	65	1	139	80	18.87	79	2	1	1	2	2	1	1	1	27	6.4	0.9	0.9	4.7	597	312	0	1	0	2	-285	47.7387	1	2	1	2	1	2
94	64	2	120	80	19.53	76	2	1	1	1	1	2	2	1	29	5.2	1.3	1.7	3	657	358	1	0	0	1	-299	45.5099	1	3	1	2	1	2
95	61	2	110	60	19.53	72	1	1	2	1	2	2	2	1	54	4.3	1	1	3	602	321	0	1	0	2	-281	46.6777	1	3	1	2	2	2
96	63	1	100	60	18.67	70	1	1	2	2	2	1	1	1	49	2.4	1	0.7	1.5	556	234	1	0	0	1	-322	57.9137	1	2	1	2	2	2
97	80	1	90	60	18.87	74	1	1	2	2	2	1	1	1	38	3.9	0.8	0.9	3	602	317	0	1	0	2	-285	47.3422	1	3	1	2	1	2
98	79	1	130	70	19.68	69	1	1	1	1	2	1	1	1	38	3	2.3	0.8	1.7	446	244	1	0	0	1	-202	45.2915	1	2	1	2	1	2
99	78	2	130	70	19.92	73	1	1	1	2	1	2	2	1	40	3.1	1	0.9	1.8	550	323	0	1	0	2	-227	41.2727	1	2	1	2	2	2
100	71	1	139	80	18.42	74	1	1	1	2	2	2	1	2	34	3.9	0.9	1.7	2	458	205	1	0	0	1	-253	55.2402	1	2	1	2	1	2
101	76	2	130	70	19.63	71	1	1	2	1	1	2	2	1	34	3.3	2.4	0.6	2.2	519	213	0	1	0	2	-306	58.9595	1	2	1	2	1	2
102	63	2	110	60	19.43	71	1	1	1	2	2	2	2	1	24	3.7	0.7	0.8	1.7	497	206	1	0	0	1	-291	58.5513	1	2	1	2	1	2
103	36	1	110	60	19.14	70	1	2	2	2	2	1	1	2	32	4	0.9	1.3	2.5	503	311	1	0	0	1	-192	38.171	1	2	2	2	1	2
104	69	1	120	80	19.61	84	1	1	1	1	2	1	1	1	34	5.6	2	1	3.7	608	377	0	1	0	2	-231	37.9934	1	3	1	2	1	2
105	39	1	110	80	18.96	81	2	1	1	2	2	1	1	1	42	6.3	2.8	1.3	4.2	557	322	1	0	0	1	-235	42.1903	1	2	2	2	2	2
106	77	1	130	80	22.15	85	2	1	2	1	2	1	1	1	44	4.6	1.9	1.2	2.8	613	344	0	1	0	2	-269	43.8825	1	3	1	2	2	2
107	70	1	120	80	20.52	80	2	1	1	2	2	1	1	2	46	4	1	1.1	2.5	576	369	1	0	0	1	-207	35.9375	1	2	1	2	2	2
108	85	2	139	80	20.24	76	2	1	1	2	1	2	2	1	39	6	0.9	1.4	4.1	712	479	0	1	0	2	-233	32.7247	2	3	1	2	1	2
109	68	1	139	85	18.42	76	1	1	2	1	2	1	1	1	42	4.7	2	1.3	2.9	448	200	1	0	0	1	-248	55.3571	1	2	1	2	2	2
110	78	2	100	60	19.29	70	1	1	1	1	2	2	2	1	32	3	0.6	1	1.7	553	296	0	1	0	2	-257	46.4738	1	2	1	2	1	2
111	65	2	130	80	20.31	76	1	1	1	2	2	2	2	1	36	6.8	1.9	1.6	4.2	487	197	0	1	0	2	-290	59.5483	1	2	1	2	1	2
112	77	2	110	70	21.76	77	1	1	2	1	1	2	2	1	52	3.6	1.6	0.9	2.2	661	439	1	0	0	1	-222	33.5855	2	3	1	2	2	2
113	84	2	139	89	21.6	76	3	2	2	2	2	2	2	2	50	2.6	0.7	1.3	1.3	490	213	1	0	0	1	-277	56.5306	1	2	1	1	2	2
114	82	2	139	80	21.48	74	2	1	2	1	1	2	2	1	45	5	1.2	0.9	3.2	624	377	0	1	0	2	-247	39.5833	2	3	1	2	2	2
115	80	2	110	60	16.65	70	1	1	1	2	2	2	2	1	36	4.4	1.9	1	2.9	564	427	1	0	0	1	-137	24.2908	2	2	1	2	1	2
116	69	1	110	60	20.32	75	2	1	2	2	1	1	1	1	59	3	0.6	0.6	2.1	779	389	1	0	0	1	-390	50.0642	1	3	1	2	2	2
117	56	2	139	85	20.4	74	2	1	2	1	1	2	2	1	44	4.3	1.3	1.2	2.8	624	401	0	1	0	2	-223	35.7372	2	3	2	2	2	2
118	73	2	139	89	21.72	74	1	1	2	1	1	2	2	1	37	4.8	2.3	0.7	3	547	293	0	1	0	2	-254	46.4351	1	2	1	2	1	2
119	88	1	139	89	21.77	78	1	1	1	2	2	1	1	1	36	4.6	1.1	1.2	2.8	501	399	1	0	0	1	-102	20.3593	1	2	1	2	1	2
120	56	1	110	60	19.92	77	1	1	1	1	1	1	1	1	30	4.3	3.1	0.9	2.6	552	347	1	0	0	1	-205	37.1377	1	2	2	2	1	2
121	74	2	120	80	15.63	74	2	1	1	2	2	2	2	1	35	4.2	1.4	0.9	2.6	606	365	0	1	0	2	-241	39.769	2	3	1	2	1	2
122	77	2	120	80	19.63	71	2	1	2	1	1	2	2	1	32	4.2	1.1	1.1	2.7	667	298	1	0	0	1	-369	55.3223	1	3	1	2	1	2
123	75	2	139	70	19.14	70	2	1	1	2	2	2	2	2	34	4.3	0.7	1.7	2.3	453	211	1	0	0	1	-242	53.4216	1	2	1	2	1	2
124	24	1	90	60	19.1	69	2	1	1	1	2	1	1	1	39	3.7	0.7	0.8	2.4	497	234	1	0	0	1	-263	52.9175	1	2	2	2	1	2
125	85	2	130	70	20.2	76	1	1	1	2	1	2	2	1	28	3.6	4.1	0.5	2.7	579	387	1	0	0	1	-192	33.1606	2	2	1	2	1	2
126	86	2	120	70	20.06	78	1	1	1	1	2	2	2	1	43	4.7	2	0.8	3.1	782	497	0	1	0	2	-285	36.445	2	3	1	2	2	2
127	88	2	100	70	19.92	70	1	1	2	2	1	2	2	1	40	4.5	1.1	0.9	3	421	212	0	1	0	2	-209	49.6437	1	1	1	2	2	2
128	81	2	130	80	20.2	70	1	1	1	1	1	2	2	1	26	4.8	1.1	1.3	3.1	478	200	0	1	0	2	-278	58.159	1	2	1	2	1	2
129	92	2	110	60	17.8	74	1	1	2	2	2	2	2	1	45	3.6	1.5	0.7	2.3	554	401	0	1	0	2	-153	27.6173	2	2	1	2	2	2
130	72	2	100	60	19.81	71	2	1	1	2	2	2	2	1	38	4.7	1.6	0.8	3.3	471	235	1	0	0	1	-236	50.1062	1	2	1	2	1	2
131	83	1	120	80	19.1	75	1	1	1	1	1	1	2	1	27	3.3	1.3	0.6	2.3	451	197	1	0	0	1	-254	56.3193	1	2	1	2	1	2
132	86	1	139	89	19.71	70	1	1	1	1	1	2	1	1	35	5.5	1.9	1.2	3.6	550	396	0	1	0	2	-154	28	1	2	1	2	1	2
133	79	1	110	60	19.29	71	1	1	2	2	2	1	1	1	55	1.9	1	0.8	1.1	467	233	1	0	0	1	-234	50.1071	1	2	1	2	2	2
134	72	2	110	60	19.38	74	3	1	2	1	1	2	2	1	31	4.5	1.8	1.4	3.6	667	339	1	0	0	1	-328	49.1754	1	3	1	1	1	2
135	42	1	120	80	19.95	74	2	2	2	2	2	1	1	2	55	3.4	0.5	1.1	2.1	576	236	0	1	0	2	-340	59.0278	1	2	2	2	2	2
136	52	2	130	89	19.57	76	2	1	1	1	1	2	2	1	30	3.8	1.1	0.8	2.2	492	341	0	1	0	2	-151	30.6911	1	2	2	2	1	2
137	63	1	139	89	20.08	80	2	1	1	1	2	1	1	1	48	2.9	1.9	0.7	1.7	501	398	0	1	0	2	-103	20.5589	1	2	1	2	2	2
138	61	2	130	89	19.38	70	2	1	2	2	1	2	2	1	53	4	3.1	1.3	2	654	321	1	0	0	1	-333	50.9174	1	3	1	2	2	2
139	67	2	130	80	19.83	76	2	1	1	1	2	2	2	1	48	3.3	3.3	0.9	1.7	566	331	0	1	0	2	-235	41.5194	1	2	1	2	2	2
140	82	1	130	70	19.57	78	2	1	1	1	1	1	1	1	61	4.6	1.8	1.1	2.7	657	452	1	0	0	1	-205	31.2024	2	3	1	2	2	2
141	67	2	139	85	20.06	75	1	1	1	2	2	2	2	1	35	4.9	8	0.9	2.4	552	257	0	1	0	2	-295	53.442	1	2	1	2	1	2
142	66	2	130	89	19.14	70	1	1	1	1	1	2	2	1	36	6.1	2.7	1	4	461	211	1	0	0	1	-250	54.2299	1	2	1	2	1	2
143	83	1	110	80	19.81	76	2	1	2	1	2	2	1	1	49	3.1	0.7	0.8	2	678	399	1	0	0	1	-279	41.1504	1	3	1	2	2	2
144	86	2	100	60	20.69	74	1	1	1	2	2	2	2	1	42	2.6	1.2	0.7	1.6	506	398	0	1	0	2	-108	21.3439	2	2	1	2	2	2
145	67	1	130	70	20.55	76	1	1	1	1	1	1	1	1	32	7.5	3.5	1	4.8	412	177	1	0	0	1	-235	57.0388	1	1	1	2	1	2
146	83	2	110	70	20.4	76	1	1	1	1	1	2	2	1	23	3.9	1.4	1.1	3	567	300	0	1	0	2	-267	47.0899	1	2	1	2	1	2
147	58	1	120	70	19.13	80	2	1	1	2	2	1	1	1	19	3.6	1.2	0.8	2.8	456	302	1	0	0	1	-154	33.7719	1	2	2	2	1	2
148	50	2	100	60	19.92	79	2	1	1	1	2	2	2	1	40	3.6	1.5	0.9	2.2	581	327	1	0	0	1	-254	43.7177	1	2	2	2	2	2
149	56	1	90	60	19.43	78	1	1	1	1	1	1	1	1	28	3.8	1.01	0.8	2.4	604	397	0	1	0	2	-207	34.2715	1	3	2	2	1	2
150	26	1	100	60	16.69	70	2	1	2	2	2	1	1	1	53	4.2	1.3	0.9	2.1	654	432	0	1	0	2	-222	33.945	2	3	2	2	2	2
151	64	1	100	60	17.58	72	1	1	2	2	2	1	1	1	62	2.5	0.9	1	1.4	642	327	0	1	0	2	-315	49.0654	1	3	1	2	2	2
152	65	1	100	60	20.08	79	1	1	1	1	2	1	1	1	37	3.5	1.3	0.9	2.3	501	322	1	0	0	1	-179	35.7285	1	2	1	2	1	2
153	83	2	110	70	18.43	76	2	1	1	2	1	2	2	1	43	4.1	0.9	0.7	3.2	557	331	1	0	0	1	-226	40.5745	1	2	1	2	2	2
154	40	1	110	70	19.83	76	2	1	1	2	2	1	1	1	44	4.6	1.4	1	3.5	601	495	0	1	0	2	-106	17.6373	2	2	2	2	2	2
155	81	2	139	89	21.48	80	2	1	1	2	2	2	2	1	33	2.3	0.6	0.9	1.4	587	311	1	0	0	1	-276	47.0187	1	2	1	2	1	2
156	37	1	100	60	17.75	74	1	1	1	1	1	1	1	1	55	3.4	1.2	0.8	2.1	523	239	0	1	0	2	-284	54.3021	1	2	2	2	2	2
157	79	1	100	60	15.82	71	1	1	1	2	2	1	2	1	52	4.1	0.8	1.1	2.6	667	396	1	0	0	1	-271	40.6297	1	3	1	2	2	2
158	68	2	130	70	21.08	80	1	1	1	2	2	2	2	1	29	6	3.4	0.9	3.1	443	312	0	1	0	2	-131	29.5711	1	1	1	2	1	2
159	75	2	130	70	19.92	76	1	1	1	1	1	2	2	1	26	6.6	0.9	1.1	4.9	445	237	0	1	0	2	-208	46.7416	1	1	1	2	1	2
160	73	2	100	60	20.7	79	2	1	1	2	2	2	2	1	46	2.9	1.5	0.8	1.4	713	401	1	0	0	1	-312	43.7588	2	3	1	2	2	2
161	62	1	100	60	20.96	78	1	1	1	2	2	1	1	1	47	3.8	1.3	0.8	2.3	441	231	1	0	0	1	-210	47.619	1	1	1	2	2	2
162	64	2	100	60	17.48	70	2	1	1	2	2	2	2	2	38	3.1	1.2	1.2	1.2	445	233	1	0	0	1	-212	47.6404	1	1	1	2	1	2
163	84	1	130	70	19.42	78	2	1	1	1	1	1	1	1	51	3.3	0.7	0.9	2.1	523	321	0	1	0	2	-202	38.6233	1	2	1	2	2	2
164	64	1	120	70	18.9	73	1	1	1	1	1	1	1	1	43	3.4	0.6	0.9	2.2	543	311	0	1	0	2	-232	42.7256	1	2	1	2	2	2
165	84	2	110	60	17.8	71	1	1	1	2	2	2	2	2	60	3.9	0.9	1.3	2.1	577	346	0	1	0	2	-231	40.0347	1	2	1	2	2	2
166	63	1	130	70	19.71	79	1	1	1	1	1	1	1	1	32	8	3	1.9	4.9	612	397	0	1	0	2	-215	35.1307	1	3	1	2	1	2
167	47	2	100	60	20.66	76	1	1	1	1	2	2	2	1	37	4	1	1	2.7	546	213	1	0	0	1	-333	60.989	1	2	2	2	1	2
168	75	1	125	75	19.81	80	2	1	1	2	2	1	2	1	42	4.7	1.1	1	3.3	456	331	1	0	0	1	-125	27.4123	1	2	1	2	2	2
169	53	1	120	70	19.29	74	2	1	2	1	2	1	1	1	40	3	0.6	0.6	2	476	275	0	1	0	2	-201	42.2269	1	2	2	2	2	2
170	86	1	90	60	21.72	80	2	1	2	2	1	1	1	1	36	3	1	1	1.3	509	368	1	0	0	1	-141	27.7014	1	2	1	2	1	2
171	75	1	110	70	22.06	75	2	1	1	2	2	1	1	2	65	3.1	0.5	1.5	1.4	668	457	1	0	0	1	-211	31.5868	2	3	1	2	2	2
172	85	1	120	80	15.82	72	1	1	1	2	2	1	1	2	24	3.6	0.6	1.7	1.7	444	312	0	1	0	2	-132	29.7297	1	1	1	2	1	2
173	76	1	90	60	20.2	76	1	1	1	1	1	1	1	1	49	3.1	1.8	0.6	1.9	431	217	0	1	0	2	-214	49.652	1	1	1	2	2	2
174	91	2	110	60	18.03	76	2	1	2	2	2	2	2	1	59	3.1	1.4	0.6	1.8	556	304	1	0	0	1	-252	45.3237	1	2	1	2	2	2
175	50	1	100	60	19.1	82	1	1	2	2	2	2	1	1	51	4.4	1.1	1.2	2.9	453	278	0	1	0	2	-175	38.6313	1	2	2	2	2	2
176	61	1	100	60	20.08	79	2	1	1	1	2	1	1	1	45	2.3	0.7	0.8	1.1	587	331	0	1	0	2	-256	43.6116	1	2	1	2	2	2
177	75	2	120	70	20.55	76	2	1	1	2	2	2	2	1	37	4.9	2.1	0.8	3.3	611	307	0	1	0	2	-304	49.7545	1	3	1	2	1	2
178	91	1	120	70	16.61	71	1	1	1	1	2	1	1	1	54	4.5	1	1.2	2.7	564	307	1	0	0	1	-257	45.5674	1	2	1	2	2	2
179	91	1	120	70	20.08	80	2	1	1	2	2	1	1	2	34	4.09	0.95	1.26	2.26	512	341	1	0	0	1	-171	33.3984	1	2	1	2	1	2
180	85	2	139	80	19.38	74	1	1	1	1	1	2	2	1	39	3.2	0.9	0.5	2	567	341	0	1	0	2	-226	39.8589	1	2	1	2	1	2
181	80	2	110	80	17.07	71	1	1	1	1	1	2	2	1	38	4.2	1.9	1.1	2.4	423	259	1	0	0	1	-164	38.7707	1	1	1	2	1	2
182	78	2	110	70	20.81	72	1	1	1	2	2	2	2	1	24	4.8	2	0.8	3.3	465	398	0	1	0	2	-67	14.4086	2	2	1	2	1	2
183	81	1	130	80	19.49	74	1	1	1	2	1	1	1	1	43	4.4	2.3	1	2.7	441	216	0	1	0	2	-225	51.0204	1	1	1	2	2	2
184	60	1	100	60	19.05	76	2	1	1	1	2	1	1	1	33	3.6	1.6	0.6	2.5	549	303	1	0	0	1	-246	44.8087	1	2	1	2	1	2
185	67	2	130	80	18.31	70	2	1	1	2	2	2	2	1	22	4.4	0.8	1.3	2.8	563	311	1	0	0	1	-252	44.7602	1	2	1	2	1	2
186	48	2	110	70	19.22	71	1	1	1	1	1	2	2	1	48	2.4	1	0.5	1.2	441	312	1	0	0	1	-129	29.2517	1	1	2	2	2	2
187	58	1	120	70	18.87	74	1	2	2	2	2	2	1	2	40	4.2	0.7	2	2	455	321	0	1	0	2	-134	29.4505	1	2	2	2	2	2
188	81	1	130	80	17.75	71	1	1	2	1	1	1	1	1	43	3.8	2.1	1	2	562	345	0	1	0	2	-217	38.6121	1	2	1	2	2	2
189	81	1	110	80	18.87	75	1	1	1	1	1	1	2	1	47	3	0.8	0.9	1.7	490	297	1	0	0	1	-193	39.3878	1	2	1	2	2	2
190	85	2	130	80	17.8	71	2	1	1	2	2	2	2	2	42	1.2	0.8	2.3	2.3	554	377	0	1	0	2	-177	31.9495	2	2	1	2	2	2
191	38	1	130	80	18.56	89	2	1	2	1	1	1	1	1	39	2.3	1	0.6	1.5	613	217	0	1	0	2	-396	64.6003	1	3	2	2	1	2
192	76	2	90	60	19.4	74	1	1	1	1	1	2	2	1	35	4	0.6	0.9	2.9	576	398	1	0	0	1	-178	30.9028	2	2	1	2	1	2
193	60	2	100	60	20.24	75	2	1	2	2	2	2	2	1	37	4.6	1.1	1	3.3	512	321	0	1	0	2	-191	37.3047	1	2	1	2	1	2
194	63	1	130	80	19.84	79	1	1	2	1	1	1	1	1	32	4.4	3.4	1	2.7	643	411	1	0	0	1	-232	36.0809	1	3	1	2	1	2
195	81	1	139	89	18.87	75	1	1	2	2	2	1	1	1	36	3.5	1.3	1	2.1	442	221	1	0	0	1	-221	50	1	1	1	2	1	2
196	86	2	120	80	15.18	69	1	1	1	1	1	2	2	1	38	2.7	1.4	0.6	1.8	431	212	0	1	0	2	-219	50.8121	1	1	1	2	1	2
197	77	2	120	70	21.8	70	1	1	2	2	1	2	2	1	35	4	2	0.6	2.7	451	237	0	1	0	2	-214	47.4501	1	2	1	2	1	2
198	80	2	110	75	17.22	72	1	1	2	2	2	2	2	1	37	3.5	1	0.9	2.3	421	201	1	0	0	1	-220	52.2565	1	1	1	2	1	2
199	56	2	120	75	19.1	70	2	1	2	2	2	2	2	1	35	3.9	1.2	0.5	2.8	561	302	0	1	0	2	-259	46.1676	1	2	2	2	1	2
200	90	2	120	80	19.96	78	2	1	2	1	1	2	2	1	31	2.3	0.7	0.9	1.2	661	413	1	0	0	1	-248	37.5189	2	3	1	2	1	2
201	52	2	139	89	16.87	72	2	1	2	1	2	2	2	1	33	3	0.6	0.9	1.9	518	308	1	0	0	1	-210	40.5405	1	2	2	2	1	2
202	44	1	120	70	25	78	1	1	2	1	1	1	1	1	38	4.4	4.8	1.6	2.7	426	305	0	1	0	2	-121	28.4038	1	1	2	2	1	1
203	45	1	130	85	21.09	78	1	1	2	1	2	1	1	1	40	5.2	1.2	1	3.7	546	342	1	0	0	1	-204	37.3626	1	2	2	2	2	2
204	29	1	125	75	22.23	74	1	1	2	2	1	1	1	1	39	4	1.4	1	2.6	521	234	1	0	0	1	-287	55.0864	1	2	2	2	1	2
205	57	1	100	60	21.01	78	1	1	2	1	1	1	1	1	36	3.1	1.2	0.6	2.1	459	303	0	1	0	2	-156	33.9869	1	2	2	2	1	2
206	75	1	130	80	21.76	74	2	1	2	1	1	1	2	1	38	4.8	1.2	1	3.2	501	302	1	0	0	1	-199	39.7206	1	2	1	2	1	2
207	55	2	130	89	18.75	74	2	1	2	2	1	2	2	1	40	5.6	0.9	1.5	3.5	573	341	0	1	0	2	-232	40.4887	1	2	2	2	2	2
208	84	2	110	70	18.03	71	2	1	1	1	2	2	2	1	35	3.7	1.1	0.7	2.4	451	278	0	1	0	2	-173	38.3592	1	2	1	2	1	2
209	78	2	110	60	18.97	70	1	1	2	1	2	2	2	1	34	5.5	1.6	0.8	3.7	576	311	1	0	0	1	-265	46.0069	1	2	1	2	1	2
210	85	2	130	80	16.02	69	2	1	1	2	1	2	2	1	36	5.3	3.7	0.6	3.3	511	246	0	1	0	2	-265	51.8591	1	2	1	2	1	2
211	62	2	110	70	19.6	74	1	1	2	1	2	2	2	1	38	5.4	1.7	1.1	3.8	433	217	1	0	0	1	-216	49.8845	1	1	1	2	1	2
212	64	2	120	70	10.76	75	1	1	2	1	1	2	2	1	38	5.6	1.9	1.2	3.8	421	219	1	0	0	1	-202	47.981	1	1	1	2	1	2
213	55	1	100	60	19.72	71	2	1	2	2	1	2	1	1	37	2.7	1	0.8	1.6	510	345	0	1	0	2	-165	32.3529	1	2	2	2	1	2
214	64	2	120	70	19.13	72	2	1	2	1	1	2	2	1	18	3.4	1.2	0.7	2.4	653	356	0	1	0	2	-297	45.4824	1	3	1	2	1	2
215	91	1	120	60	19.26	75	3	1	1	1	2	1	1	1	25	7.4	1.1	1.7	5.1	712	431	0	1	0	2	-281	39.4663	2	3	1	1	1	2
216	90	2	90	60	18.99	72	2	1	2	1	1	2	2	1	32	3.7	0.8	0.8	2.6	602	354	1	0	0	1	-248	41.196	1	3	1	2	1	2
217	69	2	130	80	18.75	72	2	1	2	1	1	2	2	1	36	5.8	2.9	0.8	3.9	541	236	1	0	0	1	-305	56.3771	1	2	1	2	1	2
218	54	1	110	70	19.78	77	2	1	2	2	1	1	1	1	38	2.2	0.6	0.8	1.3	477	231	0	1	0	2	-246	51.5723	1	2	2	2	1	2
219	58	1	110	70	18.42	72	2	1	2	1	2	1	1	1	34	4.1	1.2	0.9	2.7	471	282	0	1	0	2	-189	40.1274	1	2	2	2	1	2
220	37	1	120	80	21.8	72	2	1	1	2	2	1	1	1	31	5.8	1.8	1.2	3.9	609	304	0	1	0	2	-305	50.0821	1	3	2	2	1	2
221	36	1	120	80	18.37	88	1	1	2	1	1	1	1	1	40	7.1	1.9	1.7	4.6	576	213	1	0	0	1	-363	63.0208	1	2	2	2	2	2
222	73	2	100	60	18.97	75	1	1	1	1	2	2	2	1	25	5.8	2.9	1.4	3.4	451	267	1	0	0	1	-184	40.7982	1	2	1	2	1	2
223	79	2	100	60	20.81	75	2	1	2	2	1	2	2	1	23	16.8	8.7	1.7	9	403	276	0	1	0	2	-127	31.5136	1	1	1	2	1	2
224	68	2	110	70	19.96	78	1	1	2	1	1	2	2	1	38	3.6	1	1	2.8	564	233	1	0	0	1	-331	58.6879	1	2	1	2	1	2
225	58	1	135	85	18.78	76	1	1	2	1	1	1	1	1	22	6.1	1.3	1.7	3.8	422	121	0	1	0	2	-301	71.327	1	1	2	2	1	2
226	84	2	110	80	15.82	69	1	1	1	1	1	2	2	1	30	4.9	0.9	1.1	3	512	316	0	1	0	2	-196	38.2812	1	2	1	2	1	2
227	67	2	110	80	21.22	70	1	1	1	1	1	2	2	1	40	2.6	1	0.8	1.6	543	215	1	0	0	1	-328	60.4052	1	2	1	2	2	2
228	82	2	100	70	18.03	72	2	1	2	1	1	2	2	1	33	3.9	1.5	0.9	2.4	512	341	0	1	0	2	-171	33.3984	1	2	1	2	1	2
229	60	1	110	80	19.59	76	1	1	2	2	2	1	1	1	29	7.1	1.2	1.7	4.4	446	275	1	0	0	1	-171	38.3408	1	2	1	2	1	2
230	81	2	120	80	19.36	75	2	1	1	1	2	2	2	1	28	5.8	6.2	0.8	3.3	561	397	1	0	0	1	-164	29.2335	2	2	1	2	1	2
231	66	1	135	85	19.88	86	1	1	2	2	1	1	1	1	27	4.2	0.7	1.1	2.7	613	342	0	1	0	2	-271	44.2088	1	3	1	2	1	2
232	42	1	110	80	21.67	78	1	1	1	1	2	1	1	1	30	4.4	2.9	1	2.7	452	229	1	0	0	1	-223	49.3363	1	2	2	2	1	2
233	69	1	130	85	21.22	79	1	1	2	1	1	1	1	1	28	4.1	2	0.6	2.8	441	237	1	0	0	1	-204	46.2585	1	1	1	2	1	2
234	76	2	120	80	18.6	73	1	1	2	2	2	2	2	1	37	4.6	1.9	0.9	3.3	521	301	0	1	0	2	-220	42.2265	1	2	1	2	1	2
235	60	1	120	70	22.23	75	2	1	2	2	1	2	1	1	31	4.3	1.4	1	2.7	411	287	1	0	0	1	-124	30.1703	1	1	1	2	1	2
236	52	1	100	60	21.11	79	2	1	2	1	2	1	1	1	29	5.6	1.3	1.2	3.7	612	413	0	1	0	2	-199	32.5163	1	3	2	2	1	2
237	67	1	120	80	18.2	72	2	1	1	1	1	1	1	1	33	6.3	2.2	1.3	4.2	543	342	0	1	0	2	-201	37.0166	1	2	1	2	1	2
238	82	2	110	60	20.23	71	2	1	2	1	1	2	2	1	38	2.6	1.2	0.6	1.7	562	365	0	1	0	2	-197	35.0534	2	2	1	2	1	2
239	68	1	120	80	21.01	75	1	1	2	1	1	1	2	1	40	3	1.5	0.8	1.7	457	297	1	0	0	1	-160	35.0109	1	2	1	2	2	2
240	72	1	120	65	19.53	71	1	1	1	2	1	1	1	1	40	4.2	1.7	1.2	2.7	564	345	1	0	0	1	-219	38.8298	1	2	1	2	2	2
241	81	2	120	80	16.23	70	1	1	2	1	2	2	2	1	39	3.9	1.5	1	2.7	512	314	0	1	0	2	-198	38.6719	1	2	1	2	1	2
242	79	1	100	60	19.84	72	2	1	2	2	1	1	1	1	32	4.7	1.3	1	3.3	465	279	0	1	0	2	-186	40	1	2	1	2	1	2
243	48	2	120	80	18.21	72	1	1	2	1	2	2	2	1	25	3.9	1.7	0.9	2.3	415	234	1	0	0	1	-181	43.6145	1	1	2	2	1	2
244	76	1	120	70	20.55	76	1	1	1	2	2	1	1	1	26	6.4	2.5	1.2	4.2	432	311	1	0	0	1	-121	28.0093	1	1	1	2	1	2
245	47	1	110	70	22.39	73	2	1	2	1	2	1	1	1	29	3.8	1.2	1	2.6	506	377	0	1	0	2	-129	25.4941	1	2	2	2	1	2
246	87	1	110	80	19.63	76	2	1	2	1	2	1	1	1	33	2.4	0.7	0.7	1.7	632	344	0	1	0	2	-288	45.5696	1	3	1	2	1	2
247	66	1	110	70	18.83	71	2	1	2	1	1	1	1	1	34	4.3	2.1	0.8	2.7	598	357	0	1	0	2	-241	40.301	1	2	1	2	1	2
248	81	1	130	80	19.88	72	1	1	2	1	2	1	2	1	33	5	1.6	1.3	3	458	216	1	0	0	1	-242	52.8384	1	2	1	2	1	2
249	60	1	130	80	22.31	89	1	1	2	1	1	1	1	1	35	3.7	3.1	1	2	431	297	1	0	0	1	-134	31.0905	1	1	1	2	1	2
250	77	2	110	70	15.81	70	2	1	2	1	1	2	2	1	31	5.6	1.3	1.3	3.6	563	342	1	0	0	1	-221	39.254	1	2	1	2	1	2
251	40	2	110	70	19.47	76	1	1	2	1	2	2	2	1	30	4.2	1.7	1	2.7	614	312	0	1	0	2	-302	49.1857	1	3	2	2	1	2
252	69	1	120	80	20.18	76	1	1	2	1	2	1	1	1	37	2.7	0.8	1	1.5	511	231	1	0	0	1	-280	54.7945	1	2	1	2	1	2
253	57	2	100	60	19.63	71	2	1	2	1	2	2	2	1	24	2.3	1.5	0.7	1.3	559	302	1	0	0	1	-257	45.975	1	2	2	2	1	2
254	60	2	100	60	18.67	73	2	1	2	1	2	2	2	1	23	5.2	4.1	0.9	3.3	457	208	0	1	0	2	-249	54.4858	1	2	1	2	1	2
255	86	1	100	60	23.44	78	1	1	2	1	2	1	1	1	25	3.4	1	0.8	2	490	320	1	0	0	1	-170	34.6939	1	2	1	2	1	2
256	70	2	100	60	19.61	72	1	1	2	1	2	2	2	1	37	4.7	1.7	1	3	487	210	0	1	0	2	-277	56.8789	1	2	1	2	1	2
257	81	2	110	60	18.7	72	2	1	1	1	1	2	2	1	38	2.6	0.8	0.8	1.6	543	289	0	1	0	2	-254	46.7772	1	2	1	2	1	2
258	69	2	90	60	20.13	76	2	1	2	1	2	2	2	1	40	7	2.2	1.2	4.8	621	379	1	0	0	1	-242	38.9694	2	3	1	2	2	2
259	84	2	100	60	22.76	78	1	1	2	1	2	2	2	1	40	3	1.1	0.9	1.9	557	317	0	1	0	2	-240	43.088	1	2	1	2	2	2
260	58	1	100	60	21.3	88	2	1	2	1	2	1	1	1	36	2.5	1.1	0.8	1.5	554	298	0	1	0	2	-256	46.2094	1	2	2	2	1	2
261	65	1	110	60	22.59	76	2	1	2	1	2	1	1	1	34	4.4	3.6	0.9	2.7	497	211	1	0	0	1	-286	57.5453	1	2	1	2	1	2
262	61	1	100	60	17.09	68	1	1	1	1	2	1	2	1	38	2	0.8	0.6	1.1	453	287	1	0	0	1	-166	36.6446	1	2	1	2	1	2
263	78	2	120	80	22.1	70	1	1	2	1	1	2	2	1	33	4.8	4.6	0.9	2.8	448	201	1	0	0	1	-247	55.1339	1	2	1	2	1	2
264	77	2	110	75	18.49	73	1	1	2	1	2	2	2	1	32	4.3	1.2	1.2	2.6	512	219	0	1	0	2	-293	57.2266	1	2	1	2	1	2
265	72	1	120	80	21.22	72	2	1	2	1	1	1	2	1	20	4.6	3.4	0.7	2.9	506	317	1	0	0	1	-189	37.3518	1	2	1	2	1	2
266	61	2	120	80	20.7	77	1	1	2	1	2	2	2	1	24	6.2	1.8	1.1	4.1	578	215	0	1	0	2	-363	62.8028	1	2	1	2	1	2
267	76	1	110	60	23.73	78	2	1	1	1	1	1	1	1	30	3.9	1	1	2.5	493	207	0	1	0	2	-286	58.0122	1	2	1	2	1	2
268	55	2	135	85	18.26	74	3	1	2	1	2	2	2	1	27	6.4	0.9	0.9	4.7	602	373	1	0	0	1	-229	38.0399	2	3	2	1	1	2
269	64	1	130	85	21.34	79	2	1	2	1	2	1	1	1	26	5.2	1.3	1.7	3	523	321	1	0	0	1	-202	38.6233	1	2	1	2	1	2
270	51	1	125	75	22.15	73	1	1	2	1	1	2	1	1	34	4.3	1	1	3	598	306	0	1	0	2	-292	48.8294	1	2	2	2	1	2
271	67	2	130	80	18.2	75	3	1	2	1	2	2	2	1	30	2.4	1	0.7	1.5	723	399	0	1	0	2	-324	44.8133	2	3	1	1	1	2
272	86	2	110	60	22.03	72	2	1	1	1	2	2	2	1	32	3.9	0.8	0.9	3	533	377	1	0	0	1	-156	29.2683	2	2	1	2	1	2
273	88	2	110	65	21.08	71	2	1	1	1	2	2	2	1	40	3	2.3	0.8	1.7	493	237	0	1	0	2	-256	51.927	1	2	1	2	2	2
274	41	2	120	75	19.2	73	2	1	2	1	2	2	2	1	35	3.1	1	0.9	1.8	572	219	1	0	0	1	-353	61.7133	1	2	2	2	1	2
275	84	2	125	75	22.31	75	2	1	1	1	2	2	2	1	37	3.3	2.4	0.6	2.2	602	378	0	1	0	2	-224	37.2093	2	3	1	2	1	2
276	53	1	100	60	20.78	67	2	1	1	1	1	1	1	1	34	3.7	0.7	0.8	1.7	566	213	1	0	0	1	-353	62.3675	1	2	2	2	1	2
277	55	1	100	60	21.97	73	2	1	2	1	1	1	2	1	39	5.6	2	1	3.7	502	265	0	1	0	2	-237	47.2112	1	2	2	2	1	2
278	77	2	110	70	20.7	76	2	1	2	1	2	2	2	1	38	6.3	2.8	1.3	4.2	543	231	0	1	0	2	-312	57.4586	1	2	1	2	1	2
279	42	1	100	60	22.59	77	1	1	2	1	1	1	1	1	33	4.6	1.9	1.2	2.8	445	177	0	1	0	2	-268	60.2247	1	1	2	2	1	2
280	63	2	120	70	20.86	75	2	1	2	1	1	2	2	1	32	6	0.9	1.4	4.1	487	221	1	0	0	1	-266	54.6201	1	2	1	2	1	2
281	81	2	120	80	21.97	70	2	1	2	1	2	2	2	1	34	4.7	2	1.3	2.9	543	314	1	0	0	1	-229	42.1731	1	2	1	2	1	2
282	75	2	90	60	20.4	73	1	1	2	1	1	2	2	1	30	3	0.6	1	1.7	507	324	0	1	0	2	-183	36.0947	1	2	1	2	1	2
283	44	1	100	60	20.8	74	2	1	2	1	2	1	1	1	29	6.8	1.9	1.6	4.2	477	231	1	0	0	1	-246	51.5723	1	2	2	2	1	2
284	86	1	120	80	22	80	2	1	2	1	2	2	2	1	34	3.6	1.6	0.9	2.2	577	432	0	1	0	2	-145	25.13	2	2	1	2	1	2
285	61	1	100	60	22.1	77	3	1	2	1	2	2	1	1	35	5	1.2	0.9	3.2	664	312	0	1	0	2	-352	53.012	1	3	1	1	1	2
286	64	2	150	90	22	78	2	1	2	2	1	2	2	2	39	2.9	0.5	1.1	1.9	675	371	1	0	0	1	-304	45.037	2	3	1	2	1	2
287	82	2	160	90	19	76	2	1	2	1	2	2	2	1	35	4.4	1.9	1	2.9	543	251	1	0	0	1	-292	53.7753	1	2	1	2	1	2
288	66	1	140	90	20	75	1	1	2	2	2	1	1	1	37	3	0.6	0.6	2.1	554	342	0	1	0	2	-212	38.2671	1	2	1	2	1	2
289	64	1	130	85	22	68	2	2	2	2	2	1	1	1	32	4.3	1.3	1.2	2.8	491	237	1	0	0	1	-254	51.7312	1	2	1	2	1	2
290	59	1	120	70	25	90	2	2	2	2	2	2	1	2	36	3.8	1.1	1.1	2.3	443	206	1	0	0	1	-237	53.4989	1	1	2	2	1	1
291	53	2	120	70	23	89	2	2	1	1	2	2	2	1	38	4.8	2.3	0.7	3	476	231	0	1	0	2	-245	51.4706	1	2	2	2	1	2
292	69	1	160	100	18	80	2	1	2	1	2	1	1	1	35	4.6	1.1	1.2	2.8	564	235	1	0	0	1	-329	58.3333	1	2	1	2	1	2
293	63	1	160	100	19	78	1	1	2	2	2	2	1	1	37	4.3	3.1	0.9	2.6	612	341	1	0	0	1	-271	44.281	1	3	1	2	1	2
294	67	1	130	85	18	77	2	1	1	2	2	1	1	1	35	4.2	1.4	0.9	2.6	609	311	1	0	0	1	-298	48.9327	1	3	1	2	1	2
295	72	1	180	110	26	85	2	1	2	1	1	2	2	1	31	4.2	1.1	1.1	2.7	556	231	0	1	0	2	-325	58.4532	1	2	1	2	1	1
296	67	1	150	100	27	96	2	1	2	1	2	2	2	1	33	3.7	0.7	0.8	2.4	497	235	0	1	0	2	-262	52.7163	1	2	1	2	1	1
297	56	2	130	80	20	83	1	2	1	2	2	2	2	1	38	3.6	4.1	0.5	2.7	561	342	1	0	0	1	-219	39.0374	1	2	2	2	1	2
298	43	1	160	100	21	84	2	1	2	2	2	2	1	2	40	2.8	0.7	1.2	1.6	514	213	0	1	0	2	-301	58.5603	1	2	2	2	2	2
299	55	1	150	90	20	76	2	1	1	2	2	1	1	1	39	4.7	2	0.8	3.1	458	211	1	0	0	1	-247	53.9301	1	2	2	2	1	2
300	61	2	120	70	27	90	1	2	2	1	2	2	2	1	36	4.5	1.1	0.9	3	547	312	0	1	0	2	-235	42.9616	1	2	1	2	1	1
301	71	2	130	80	18	80	2	2	1	2	1	2	2	2	38	4.3	1.4	1.2	2.5	498	311	1	0	0	1	-187	37.5502	1	2	1	2	1	2
302	66	1	140	90	18	85	1	1	2	2	2	2	2	1	40	4.8	1.1	1.3	3.1	512	231	0	1	0	2	-281	54.8828	1	2	1	2	2	2
303	48	1	150	100	27	102	2	1	1	1	2	1	2	1	35	3.6	1.5	0.7	2.3	718	431	1	0	0	1	-287	39.9721	2	3	2	2	1	1
304	76	1	140	90	25	93	2	1	1	2	2	2	1	1	34	4.7	1.6	0.8	3.3	534	312	0	1	0	2	-222	41.573	1	2	1	2	1	1
305	59	1	160	100	19	81	2	1	2	2	2	2	1	1	36	3.3	1.3	0.6	2.3	563	321	1	0	0	1	-242	42.984	1	2	2	2	1	2
306	52	1	120	70	22	78	2	2	1	2	2	1	2	2	38	3.7	1.3	1.1	2.2	547	213	0	1	0	2	-334	61.0603	1	2	2	2	1	2
307	66	2	170	100	23	79	2	1	2	2	2	2	2	1	38	5.5	1.9	1.2	3.6	499	203	0	1	0	2	-296	59.3186	1	2	1	2	1	2
308	77	2	140	80	19	67	1	1	1	2	2	2	2	1	37	1.9	1	0.8	1.1	491	312	0	1	0	2	-179	36.4562	1	2	1	2	1	2
309	80	1	200	110	30	106	1	1	2	1	2	2	1	2	18	3.5	1.1	1.1	2.1	501	327	1	0	0	1	-174	34.7305	1	2	1	2	1	1
310	64	2	150	90	26	98	2	1	1	1	1	2	2	1	25	4.5	1.8	1.4	3.6	541	324	1	0	0	1	-217	40.1109	1	2	1	2	1	1
311	68	2	140	90	31	85	2	1	2	2	2	2	2	1	32	3.8	1.1	0.8	2.2	601	357	0	1	0	2	-244	40.599	1	2	1	2	1	1
312	66	2	130	70	19	70	2	2	1	2	2	2	2	1	36	2.9	1.9	0.7	1.7	578	2331	0	1	0	2	1753	-303.287	2	2	1	2	1	2
313	79	2	170	100	18	76	1	1	2	2	2	2	2	1	38	4	3.1	1.3	2	487	321	1	0	0	1	-166	34.0862	1	2	1	2	1	2
314	75	2	160	100	23	87	2	1	1	2	2	2	2	1	34	3.3	3.3	0.9	1.7	563	235	1	0	0	1	-328	58.2593	1	2	1	2	1	2
315	77	2	110	60	20	86	1	2	2	2	2	2	2	1	31	4.6	1.8	1.1	2.7	465	219	0	1	0	2	-246	52.9032	1	2	1	2	1	2
316	76	2	100	60	24	69	1	2	1	2	2	2	2	2	40	3.5	1.4	1.1	2.1	434	112	0	1	0	2	-322	74.1935	1	1	1	2	2	2
317	52	1	140	90	23	92	2	1	2	1	2	1	1	1	25	4.9	8	0.9	2.4	517	219	1	0	0	1	-298	57.6402	1	2	2	2	1	2
318	73	1	180	120	32	110	2	1	2	1	1	2	2	2	23	3.1	0.7	1.8	1.2	617	354	1	0	0	1	-263	42.6256	1	3	1	2	1	1
319	57	1	110	80	26	95	1	2	1	2	2	2	1	1	38	6.1	2.7	1	4	466	231	0	1	0	2	-235	50.4292	1	2	2	2	1	1
320	85	2	190	120	26	96	2	1	1	1	2	2	2	1	22	3.1	0.7	0.8	2	490	208	1	0	0	1	-282	57.551	1	2	1	2	1	1
321	56	2	140	90	22	77	1	1	2	1	2	2	2	1	30	2.6	1.2	0.7	1.6	513	237	1	0	0	1	-276	53.8012	1	2	2	2	1	2
322	80	2	170	110	21	87	2	1	2	1	2	2	2	1	40	7.5	3.5	1	4.8	476	198	0	1	0	2	-278	58.4034	1	2	1	2	2	2
323	75	2	200	120	19	79	2	1	2	2	2	2	2	1	33	3.9	1.4	1.1	3	623	412	0	1	0	2	-211	33.8684	2	3	1	2	1	2
324	50	2	120	70	24	90	1	2	2	1	2	2	2	1	29	3.6	1.2	0.8	2.8	497	234	1	0	0	1	-263	52.9175	1	2	2	2	1	2
325	80	1	130	90	23	91	2	2	1	1	2	2	1	1	28	3.6	1.5	0.9	2.2	511	213	0	1	0	2	-298	58.317	1	2	1	2	1	2
326	78	2	150	90	26	100	1	1	2	1	2	2	2	2	27	3.5	1.1	1.2	2	611	324	1	0	0	1	-287	46.9722	1	3	1	2	1	1
327	87	2	160	100	28	92	1	1	2	2	2	2	2	1	30	3.8	1.01	0.8	2.4	406	235	0	1	0	2	-171	42.1182	1	1	1	2	1	1
328	64	1	120	70	26	98	2	2	1	1	2	1	1	1	28	4.2	1.3	0.9	2.1	421	201	1	0	0	1	-220	52.2565	1	1	1	2	1	1
329	66	1	170	90	19	69	2	1	1	2	2	2	2	2	37	3.5	0.9	1.1	2	661	397	0	1	0	2	-264	39.9395	1	3	1	2	1	2
330	78	2	100	60	27	98	2	2	1	1	2	2	2	1	31	2.5	0.9	1	1.4	552	231	1	0	0	1	-321	58.1522	1	2	1	2	1	1
331	56	2	120	70	28	90	2	2	2	1	1	2	2	2	29	2.9	0.9	1.2	1.4	542	301	0	1	0	2	-241	44.4649	1	2	2	2	1	1
332	64	1	150	90	24	88	1	1	1	2	2	2	1	1	33	3.5	1.3	0.9	2.3	406	204	0	1	0	2	-202	49.7537	1	1	1	2	1	2
333	74	1	130	70	20	89	2	2	2	2	2	2	2	1	38	4.1	0.9	0.7	3.2	429	113	1	0	0	1	-316	73.6597	1	1	1	2	1	2
334	46	2	110	60	17	75	2	2	2	1	2	2	2	1	40	4.6	1.4	1	3.5	400	206	1	0	0	1	-194	48.5	1	1	2	2	2	2
335	70	1	100	60	20	84	2	2	2	2	2	2	2	1	40	2.3	0.6	0.9	1.4	517	304	0	1	0	2	-213	41.1992	1	2	1	2	2	2
336	48	2	110	70	21	68	1	2	2	2	2	2	2	1	39	3.4	1.2	0.8	2.1	603	298	1	0	0	1	-305	50.5804	1	3	2	2	1	2
337	69	1	150	90	24	90	1	1	2	2	1	1	1	2	32	4.1	1.2	1.2	2.4	399	112	1	0	0	1	-287	71.9298	1	1	1	2	1	2
338	83	2	150	100	28	94	1	1	2	1	2	2	2	1	25	4.1	0.8	1.1	2.6	557	310	0	1	0	2	-247	44.3447	1	2	1	2	1	1
339	54	2	170	100	26	92	2	1	1	1	2	2	2	1	26	6	3.4	0.9	3.1	601	325	1	0	0	1	-276	45.9235	1	2	2	2	1	1
340	62	1	110	60	21	86	2	2	1	2	2	2	1	1	29	6.6	0.9	1.1	4.9	542	231	1	0	0	1	-311	57.3801	1	2	1	2	1	2
341	59	1	120	70	20	90	2	2	1	1	2	2	1	1	33	2.9	1.5	0.8	1.4	465	231	0	1	0	2	-234	50.3226	1	2	2	2	1	2
342	72	1	130	80	25	92	1	2	2	2	2	2	2	1	34	3.8	1.3	0.8	2.3	452	123	1	0	0	1	-329	72.7876	1	2	1	2	1	1
343	73	2	140	80	18	80	1	1	1	1	2	2	1	1	33	3.3	0.7	0.9	2.1	513	244	0	1	0	2	-269	52.4366	1	2	1	2	1	2
344	79	1	160	100	20	81	2	1	2	2	2	2	2	1	35	3.4	0.6	0.9	2.2	662	357	0	1	0	2	-305	46.0725	1	3	1	2	1	2
345	72	2	180	110	22	93	1	1	2	2	2	2	2	1	31	8	3	1.9	4.9	412	201	1	0	0	1	-211	51.2136	1	1	1	2	1	2
346	55	2	120	80	24	95	1	2	1	1	2	2	2	1	30	4	1	1	2.7	532	311	0	1	0	2	-221	41.5414	1	2	2	2	1	2
347	61	1	140	90	23	90	2	1	2	2	2	1	1	1	37	4.7	1.1	1	3.3	486	210	1	0	0	1	-276	56.7901	1	2	1	2	1	2
348	78	2	150	90	26	108	3	1	1	1	2	2	2	1	24	3	0.6	0.6	2	578	213	1	0	0	1	-365	63.1488	1	2	1	1	1	1
349	64	2	160	100	19	86	2	1	2	2	2	2	2	1	23	3	1	1	1.3	612	322	0	1	0	2	-290	47.3856	1	3	1	2	1	2
350	77	2	170	100	17	87	2	1	1	1	2	2	2	1	25	3.1	1.8	0.6	1.9	565	233	1	0	0	1	-332	58.7611	1	2	1	2	1	2
351	41	1	150	90	26	99	1	1	2	2	2	2	1	1	37	3.1	1.4	0.6	1.8	490	232	0	1	0	2	-258	52.6531	1	2	2	2	1	1
352	51	1	110	60	20	76	2	2	2	2	2	2	1	1	38	4.4	1.1	1.2	2.9	548	217	1	0	0	1	-331	60.4015	1	2	2	2	1	2
353	62	1	140	90	27	95	2	1	2	1	2	2	1	1	40	2.3	0.7	0.8	1.1	551	209	0	1	0	2	-342	62.069	1	2	1	2	2	1
354	64	1	150	80	25	90	2	1	2	2	2	2	1	1	40	4.9	2.1	0.8	3.3	468	214	1	0	0	1	-254	54.2735	1	2	1	2	2	1
355	66	1	130	90	22	87	2	2	1	1	2	2	2	1	36	4.5	1	1.2	2.7	543	300	0	1	0	2	-243	44.7514	1	2	1	2	1	2
356	75	2	160	90	28	92	2	1	1	2	1	2	2	1	34	3.2	0.9	0.5	2	487	231	1	0	0	1	-256	52.5667	1	2	1	2	1	1
357	56	1	180	100	21	89	1	1	2	2	2	1	2	1	38	4.2	1.9	1.1	2.4	432	227	0	1	0	2	-205	47.4537	1	1	2	2	1	2
358	72	2	170	90	29	94	2	1	2	1	2	2	2	1	33	4.8	2	0.8	3.3	541	246	0	1	0	2	-295	54.5287	1	2	1	2	1	1
359	70	2	140	90	18	80	2	1	2	2	2	2	2	1	32	4.4	2.3	1	2.7	501	312	1	0	0	1	-189	37.7246	1	2	1	2	1	2
360	75	1	150	90	17	89	2	1	1	1	2	1	1	1	20	3.6	1.6	0.6	2.5	499	197	1	0	0	1	-302	60.521	1	2	1	2	1	2
361	77	1	160	110	27	97	1	1	1	2	2	2	1	1	24	4.4	0.8	1.3	2.8	532	209	0	1	0	2	-323	60.7143	1	2	1	2	1	1
362	64	1	100	60	26	95	1	2	2	1	2	1	1	2	30	4.2	1.6	1.1	2.5	612	376	0	1	0	2	-236	38.5621	1	3	1	2	1	1
363	71	1	170	110	19	87	1	1	1	2	1	2	1	1	27	2.4	1	0.5	1.2	486	231	1	0	0	1	-255	52.4691	1	2	1	2	1	2
364	75	1	140	90	18	76	2	1	1	1	2	2	2	1	26	3.8	2.1	1	2	457	311	0	1	0	2	-146	31.9475	1	2	1	2	1	2
365	67	2	140	80	24	93	2	1	2	2	2	2	2	1	34	3	0.8	0.9	1.7	564	211	1	0	0	1	-353	62.5887	1	2	1	2	1	2
366	67	2	170	90	20	89	1	1	2	2	2	1	2	1	30	2.3	1	0.6	1.5	486	242	0	1	0	2	-244	50.2058	1	2	1	2	1	2
367	55	2	110	60	21	84	1	2	2	2	2	2	2	1	32	4	0.6	0.9	2.9	448	186	0	1	0	2	-262	58.4821	1	2	2	2	1	2
368	69	2	150	80	26	76	2	1	2	2	2	2	2	1	40	4.6	1.1	1	3.3	566	233	1	0	0	1	-333	58.8339	1	2	1	2	2	1
369	62	1	160	100	17	79	2	1	2	2	2	2	1	2	35	3.4	1.1	1.1	1.8	578	300	0	1	0	2	-278	48.0969	1	2	1	2	1	2
370	84	2	130	90	24	82	1	1	1	1	1	2	2	1	37	4.4	3.4	1	2.7	448	125	1	0	0	1	-323	72.0982	1	2	1	2	1	2
371	75	2	160	100	23	90	2	1	2	2	2	2	2	1	34	3.5	1.3	1	2.1	597	312	0	1	0	2	-285	47.7387	1	2	1	2	1	2
372	63	2	150	90	30	97	2	1	2	2	2	2	2	1	39	2.7	1.4	0.6	1.8	654	345	0	1	0	2	-309	47.2477	1	3	1	2	1	1
373	56	2	100	60	31	95	1	2	2	2	2	2	2	1	38	4	2	0.6	2.7	431	199	1	0	0	1	-232	53.8283	1	1	2	2	1	1
374	65	1	110	70	28	90	1	2	2	2	2	1	1	1	33	3.5	1	0.9	2.3	402	196	1	0	0	1	-206	51.2438	1	1	1	2	1	1
375	74	2	130	70	23	96	2	2	2	1	2	2	2	1	32	3.9	1.2	0.5	2.8	452	233	0	1	0	2	-219	48.4513	1	2	1	2	1	2
376	69	2	140	90	22	79	2	1	1	2	2	2	2	1	34	2.3	0.7	0.9	1.2	512	254	1	0	0	1	-258	50.3906	1	2	1	2	1	2
377	68	2	160	100	22	82	2	2	1	1	1	2	2	1	30	3	0.6	0.9	1.9	542	278	1	0	0	1	-264	48.7085	1	2	1	2	1	2
378	56	2	120	70	18	87	2	2	2	2	2	2	2	1	29	4.4	4.8	1.6	2.7	487	211	1	0	0	1	-276	56.6735	1	2	2	2	1	2
379	67	1	100	60	29	97	2	2	2	2	2	1	1	1	34	5.2	1.2	1	3.7	568	314	0	1	0	2	-254	44.7183	1	2	1	2	1	1
380	71	2	120	70	21	79	1	2	2	2	2	2	2	1	35	4	1.4	1	2.6	445	201	0	1	0	2	-244	54.8315	1	1	1	2	1	2
381	68	1	130	80	17	76	1	2	2	2	2	2	1	1	30	3.1	1.2	0.6	2.1	568	302	1	0	0	1	-266	46.831	1	2	1	2	1	2
382	65	2	170	90	27	96	1	1	2	1	1	2	2	1	21	4.8	1.2	1	3.2	499	200	0	1	0	2	-299	59.9198	1	2	1	2	1	1
383	75	2	120	70	28	110	2	2	2	1	2	2	2	1	30	5.6	0.9	1.5	3.5	464	312	1	0	0	1	-152	32.7586	1	2	1	2	1	1
384	52	1	150	90	31	98	2	1	1	2	2	2	1	1	22	3.7	1.1	0.7	2.4	442	197	0	1	0	2	-245	55.4299	1	1	2	2	1	1
385	56	2	160	100	23	90	2	1	2	2	2	2	2	1	27	5.5	1.6	0.8	3.7	641	316	1	0	0	1	-325	50.702	1	3	2	2	1	2
386	49	1	140	90	22	81	2	1	2	2	2	1	2	1	28	5.3	3.7	0.6	3.3	521	302	0	1	0	2	-219	42.0345	1	2	2	2	1	2
387	67	2	120	70	27	97	2	2	2	2	2	2	1	1	30	5.4	1.7	1.1	3.8	776	359	1	0	0	1	-417	53.7371	1	3	1	2	1	1
388	67	2	130	80	19	78	2	2	2	2	2	2	1	1	40	5.6	1.9	1.2	3.8	564	325	0	1	0	2	-239	42.3759	1	2	1	2	2	2
389	69	1	170	100	18	77	2	1	2	2	2	2	2	1	36	2.7	1	0.8	1.6	576	312	1	0	0	1	-264	45.8333	1	2	1	2	1	2
390	59	2	140	90	20	85	1	1	1	1	2	2	2	1	38	3.4	1.2	0.7	2.4	497	234	0	1	0	2	-263	52.9175	1	2	2	2	1	2
391	72	1	150	90	25	94	1	1	1	1	1	2	1	1	29	7.4	1.1	1.7	5.1	456	136	1	0	0	1	-320	70.1754	1	2	1	2	1	1
392	61	2	120	70	26	89	2	2	2	2	2	2	2	1	31	3.7	0.8	0.8	2.6	469	214	0	1	0	2	-255	54.371	1	2	1	2	1	1
393	60	2	110	60	30	94	2	2	2	2	2	2	2	1	26	5.8	2.9	0.8	3.9	645	364	1	0	0	1	-281	43.5659	2	3	1	2	1	1
394	64	2	150	80	17	82	3	1	1	2	2	2	2	1	32	2.2	0.6	0.8	1.3	502	307	0	1	0	2	-195	38.8446	1	2	1	1	1	2
395	67	2	100	60	21	68	3	2	2	2	2	2	2	1	34	4.1	1.2	0.9	2.7	744	351	0	1	0	2	-393	52.8226	1	3	1	1	1	2
396	61	1	130	70	26	86	2	2	1	1	1	1	1	1	28	5.8	1.8	1.2	3.9	624	376	0	1	0	2	-248	39.7436	1	3	1	2	1	1
397	59	2	160	90	29	96	2	1	2	1	2	2	2	1	25	7.1	1.9	1.7	4.6	504	312	1	0	0	1	-192	38.0952	1	2	2	2	1	1
398	81	1	170	100	20	78	2	1	1	2	1	2	2	1	40	5.8	2.9	1.4	3.4	496	223	1	0	0	1	-273	55.0403	1	2	1	2	2	2
399	62	2	160	90	20	73	2	1	1	2	2	2	2	1	39	16.8	8.7	1.7	9	653	345	0	1	0	2	-308	47.1669	1	3	1	2	1	2
400	57	1	150	90	24	87	2	1	2	2	2	2	2	2	37	3.7	1.1	1.1	2.2	509	237	1	0	0	1	-272	53.4381	1	2	2	2	1	2
401	60	2	160	90	21	86	2	1	1	1	1	2	2	1	32	3.6	1	1	2.8	632	352	0	0	1	3	-280	44.3038	1	3	1	2	1	2
402	47	2	120	70	23	80	2	2	2	2	2	2	2	1	35	6.1	1.3	1.7	3.8	597	301	0	0	1	3	-296	49.5812	1	2	2	2	1	2
403	64	1	150	90	19	85	1	1	1	2	2	1	1	1	37	4.9	0.9	1.1	3	465	212	0	0	1	3	-253	54.4086	1	2	1	2	1	2
404	65	2	110	70	20	82	1	2	2	2	2	2	2	1	37	2.6	1	0.8	1.6	512	317	0	0	1	3	-195	38.0859	1	2	1	2	1	2
405	80	2	120	80	28	96	3	2	1	1	1	2	2	1	31	3.9	1.5	0.9	2.4	668	321	0	0	1	3	-347	51.9461	1	3	1	1	1	1
406	67	2	140	90	18	69	2	1	2	2	2	2	2	1	39	7.1	1.2	1.7	4.4	477	212	0	0	1	3	-265	55.5556	1	2	1	2	1	2
407	55	2	110	60	21	70	2	2	2	2	2	2	2	1	39	5.8	6.2	0.8	3.3	499	233	0	0	1	3	-266	53.3066	1	2	2	2	1	2
408	85	2	90	60	20.66	70	2	1	1	1	1	2	2	1	35	4.2	0.7	1.1	2.7	564	315	0	0	1	3	-249	44.1489	1	2	1	2	1	2
409	79	1	110	70	21.08	72	2	1	1	1	1	1	1	1	29	4.4	2.9	1	2.7	634	345	0	0	1	3	-289	45.5836	1	3	1	2	1	2
410	84	1	90	60	21.97	75	2	1	1	2	2	1	1	1	58	4.1	2	0.6	2.8	632	346	0	0	1	3	-286	45.2532	1	3	1	2	2	2
411	76	1	130	89	17.58	72	1	1	1	1	1	1	1	1	40	4.6	1.9	0.9	3.3	576	231	0	0	1	3	-345	59.8958	1	2	1	2	2	2
412	57	1	110	80	20.06	80	1	1	1	1	1	1	1	1	42	4.3	1.4	1	2.7	577	211	0	0	1	3	-366	63.4315	1	2	2	2	2	2
413	81	2	139	80	19.72	69	3	1	2	2	2	2	2	1	40	5.6	1.3	1.2	3.7	664	301	0	0	1	3	-363	54.6687	1	3	1	1	2	2
414	86	2	130	80	19.38	74	2	1	1	2	1	2	2	1	30	6.3	2.2	1.3	4.2	524	310	0	0	1	3	-214	40.8397	1	2	1	2	1	2
415	49	1	110	70	22.86	81	2	1	1	1	2	1	1	1	34	2.6	1.2	0.6	1.7	596	224	0	0	1	3	-372	62.4161	1	2	2	2	1	2
416	57	2	110	60	19.14	69	3	1	1	2	2	2	2	1	42	3	1.5	0.8	1.7	611	324	0	0	1	3	-287	46.9722	1	3	2	1	2	2
417	54	2	100	60	18.29	70	2	1	2	2	2	2	2	1	36	4.2	1.7	1.2	2.7	667	311	0	0	1	3	-356	53.3733	1	3	2	2	1	2
418	81	2	130	80	19.38	78	1	1	1	2	2	2	2	1	28	3.9	1.5	1	2.7	512	231	0	0	1	3	-281	54.8828	1	2	1	2	1	2
419	62	1	130	80	20.55	84	2	1	1	2	2	1	2	1	42	4.7	1.3	1	3.3	631	326	0	0	1	3	-305	48.336	1	3	1	2	2	2
420	43	1	100	70	22.1	76	2	1	1	1	1	1	1	1	21	3.9	1.7	0.9	2.3	546	214	0	0	1	3	-332	60.8059	1	2	2	2	1	2
421	45	2	139	80	20.31	76	2	2	2	2	2	2	2	2	61	3.9	0.9	1.7	2	654	279	0	0	1	3	-375	57.3394	1	3	2	2	2	2
422	56	2	120	80	20.06	70	2	1	1	2	2	2	2	1	36	6.4	2.5	1.2	4.2	609	312	0	0	1	3	-297	48.7685	1	3	2	2	1	2
423	62	1	110	60	21.05	78	2	1	1	2	2	1	1	1	47	3.8	1.2	1	2.6	542	238	0	0	1	3	-304	56.0886	1	2	1	2	2	2
424	60	2	100	60	15.23	63	2	1	1	1	2	2	2	1	46	2.4	0.7	0.7	1.7	783	411	0	0	1	3	-372	47.5096	2	3	1	2	2	2
425	75	2	130	80	22.03	78	2	1	2	2	1	2	2	1	48	4.3	2.1	0.8	2.7	553	314	0	0	1	3	-239	43.2188	1	2	1	2	2	2
426	61	2	95	60	20.83	76	2	1	2	1	1	2	2	1	42	5	1.6	1.3	3	509	286	0	0	1	3	-223	43.8114	1	2	1	2	2	2
427	79	2	120	70	19.92	74	2	1	2	2	2	2	2	1	37	3.7	3.1	1	2	511	312	0	0	1	3	-199	38.9432	1	2	1	2	1	2
428	84	1	120	70	15.43	68	2	1	1	2	2	2	1	1	32	5.6	1.3	1.3	3.6	653	234	0	0	1	3	-419	64.1654	1	3	1	2	1	2
429	66	1	100	60	19.49	81	2	1	1	2	2	1	1	1	32	4.2	1.7	1	2.7	632	321	0	0	1	3	-311	49.2089	1	3	1	2	1	2
430	91	2	100	60	19.15	70	2	1	1	1	1	2	2	1	25	2.7	0.8	1	1.5	723	342	0	0	1	3	-381	52.6971	1	3	1	2	1	2
431	58	2	110	60	20.57	78	2	1	2	2	2	2	2	1	51	2.3	1.5	0.7	1.3	665	201	0	0	1	3	-464	69.7744	1	3	2	2	2	2
432	49	1	100	60	21.26	74	2	1	2	2	2	1	1	1	31	5.2	4.1	0.9	3.3	537	175	0	0	1	3	-362	67.4115	1	2	2	2	1	2
433	58	1	130	80	21.01	76	1	1	1	2	1	1	1	1	18	3.4	1	0.8	2	490	211	0	0	1	3	-279	56.9388	1	2	2	2	1	2
434	71	1	100	60	18.99	71	1	1	2	1	2	1	1	1	58	4.7	1.7	1	3	497	231	0	0	1	3	-266	53.5211	1	2	1	2	2	2
435	81	2	139	80	19.78	71	1	1	2	2	2	2	2	1	38	2.6	0.8	0.8	1.6	455	123	0	0	1	3	-332	72.967	1	2	1	2	1	2
436	75	2	130	89	21.09	78	1	1	2	2	2	2	2	1	36	7	2.2	1.2	4.8	576	231	0	0	1	3	-345	59.8958	1	2	1	2	1	2
437	85	1	100	60	19.63	69	2	1	1	2	2	1	1	2	24	4	0.9	1.3	2.5	654	257	0	0	1	3	-397	60.7034	1	3	1	2	1	2
438	84	1	139	80	19.47	80	2	1	1	2	2	1	1	2	44	4	1	1.1	2.5	576	254	0	0	1	3	-322	55.9028	1	2	1	2	2	2
439	70	1	80	40	18.78	70	2	1	1	1	1	1	1	1	36	3	1.1	0.9	1.9	643	235	0	0	1	3	-408	63.4526	1	3	1	2	1	2
440	69	1	139	89	19.81	72	3	1	1	1	1	1	1	1	31	2.5	1.1	0.8	1.5	755	324	0	0	1	3	-431	57.0861	1	3	1	1	1	2
441	25	2	110	70	18	68	2	1	1	1	1	2	2	1	33	4.4	3.6	0.9	2.7	511	231	0	0	1	3	-280	54.7945	1	2	2	2	1	2
442	90	2	139	89	19.57	75	2	1	1	2	2	2	2	2	40	2.6	0.7	1.3	1.3	542	301	0	0	1	3	-241	44.4649	1	2	1	2	2	2
443	62	1	90	60	20.32	81	2	1	1	1	1	1	2	1	37	2	0.8	0.6	1.1	600	321	0	0	1	3	-279	46.5	1	2	1	2	1	2
444	59	1	130	80	18.78	72	2	1	1	1	1	1	1	1	20	4.8	4.6	0.9	2.8	597	213	0	0	1	3	-384	64.3216	1	2	2	2	1	2
445	88	2	120	60	18.9	69	2	1	1	1	1	2	2	1	37	4.3	1.2	1.2	2.6	496	201	0	0	1	3	-295	59.4758	1	2	1	2	1	2
446	68	1	120	80	20.45	74	2	1	1	2	2	1	1	2	26	4.3	0.7	1.7	2.3	489	206	0	0	1	3	-283	57.8732	1	2	1	2	1	2
447	75	1	100	60	17.97	74	2	1	1	2	2	1	1	2	26	3.4	0.5	1.1	2.1	654	231	0	0	1	3	-423	64.6789	1	3	1	2	1	2
448	48	2	120	80	22.1	78	2	1	1	2	2	2	2	1	17	4.6	3.4	0.7	2.9	631	324	0	0	1	3	-307	48.6529	1	3	2	2	1	2
449	85	2	130	70	19.14	73	2	1	1	2	2	2	2	2	36	3.1	1.2	1.2	1.2	651	324	0	0	1	3	-327	50.2304	1	3	1	2	1	2
450	77	2	139	80	19.38	75	3	1	2	1	1	2	2	1	48	6.2	1.8	1.1	4.1	668	246	0	0	1	3	-422	63.1737	1	3	1	1	2	2
451	88	2	130	80	20.06	77	1	1	1	1	1	2	2	1	58	3.9	1	1	2.5	491	124	0	0	1	3	-367	74.7454	1	2	1	2	2	2
452	65	1	139	80	18.87	79	2	1	1	2	2	1	1	1	27	6.4	0.9	0.9	4.7	521	201	0	0	1	3	-320	61.4203	1	2	1	2	1	2
453	64	2	120	80	19.53	76	2	1	1	1	1	2	2	1	29	5.2	1.3	1.7	3	503	231	0	0	1	3	-272	54.0755	1	2	1	2	1	2
454	61	2	110	60	19.53	72	2	1	2	1	2	2	2	1	54	4.3	1	1	3	569	243	0	0	1	3	-326	57.2935	1	2	1	2	2	2
455	63	1	100	60	18.67	70	3	1	2	2	2	1	1	1	49	2.4	1	0.7	1.5	632	301	0	0	1	3	-331	52.3734	1	3	1	1	2	2
456	80	1	90	60	18.87	74	2	1	2	2	2	1	1	1	38	3.9	0.8	0.9	3	506	212	0	0	1	3	-294	58.1028	1	2	1	2	1	2
457	79	1	130	70	19.68	69	2	1	1	1	2	1	1	1	38	3	2.3	0.8	1.7	686	324	0	0	1	3	-362	52.7697	1	3	1	2	1	2
458	78	2	130	70	19.92	73	2	1	1	2	1	2	2	1	40	3.1	1	0.9	1.8	532	186	0	0	1	3	-346	65.0376	1	2	1	2	2	2
459	71	1	139	80	18.42	74	2	1	1	2	2	2	1	2	34	3.9	0.9	1.3	2.1	564	321	0	0	1	3	-243	43.0851	1	2	1	2	1	2
460	76	2	130	70	19.63	71	2	1	2	1	1	2	2	1	34	3.3	2.4	0.6	2.2	598	223	0	0	1	3	-375	62.709	1	2	1	2	1	2
461	63	2	110	60	19.43	71	3	1	1	2	2	2	2	1	24	3.7	0.7	0.8	1.7	690	242	0	0	1	3	-448	64.9275	1	3	1	1	1	2
462	36	1	110	60	19.14	70	2	2	2	2	2	1	1	2	32	3.1	0.5	1.5	1.4	578	305	0	0	1	3	-273	47.2318	1	2	2	2	1	2
463	69	1	120	80	19.61	84	3	1	1	1	2	1	1	1	34	5.6	2	1	3.7	788	368	0	0	1	3	-420	53.2995	1	3	1	1	1	2
464	39	1	110	80	18.96	81	2	1	1	2	2	1	1	1	42	6.3	2.8	1.3	4.2	656	321	0	0	1	3	-335	51.0671	1	3	2	2	2	2
465	77	1	130	80	22.15	85	2	1	2	1	2	1	1	1	44	4.6	1.9	1.2	2.8	511	223	0	0	1	3	-288	56.3601	1	2	1	2	2	2
466	70	1	120	80	20.52	80	2	1	1	2	2	1	1	2	46	3.6	0.6	1.7	1.7	566	212	0	0	1	3	-354	62.5442	1	2	1	2	2	2
467	85	2	139	80	20.24	76	2	1	1	2	1	2	2	1	39	6	0.9	1.4	4.1	663	268	0	0	1	3	-395	59.5777	1	3	1	2	1	2
468	68	1	139	85	18.42	76	2	1	2	1	2	1	1	1	42	4.7	2	1.3	2.9	633	324	0	0	1	3	-309	48.8152	1	3	1	2	2	2
469	78	2	100	60	19.29	70	2	1	1	1	2	2	2	1	32	3	0.6	1	1.7	566	211	0	0	1	3	-355	62.7208	1	2	1	2	1	2
470	65	2	130	80	20.31	76	2	1	1	2	2	2	2	1	36	6.8	1.9	1.6	4.2	542	230	0	0	1	3	-312	57.5646	1	2	1	2	1	2
471	77	2	110	70	21.76	77	2	1	2	1	1	2	2	1	52	3.6	1.6	0.9	2.2	668	321	0	0	1	3	-347	51.9461	1	3	1	2	2	2
472	84	2	139	89	21.6	76	2	2	2	2	2	2	2	2	50	4.09	0.95	1.26	2.26	686	344	0	0	1	3	-342	49.8542	1	3	1	2	2	2
473	82	2	139	80	21.48	74	2	1	2	1	1	2	2	1	45	5	1.2	0.9	3.2	564	232	0	0	1	3	-332	58.8652	1	2	1	2	2	2
474	80	2	110	60	16.65	70	3	1	1	2	2	2	2	1	36	4.4	1.9	1	2.9	744	365	0	0	1	3	-379	50.9409	2	3	1	1	1	2
475	69	1	110	60	20.32	75	2	1	2	2	1	1	1	1	59	3	0.6	0.6	2.1	568	243	0	0	1	3	-325	57.2183	1	2	1	2	2	2
476	56	2	139	85	20.4	74	2	1	2	1	1	2	2	1	44	4.3	1.3	1.2	2.8	654	333	0	0	1	3	-321	49.0826	1	3	2	2	2	2
477	73	2	139	89	21.72	74	2	1	2	1	1	2	2	1	37	4.8	2.3	0.7	3	566	214	0	0	1	3	-352	62.1908	1	2	1	2	1	2
478	88	1	139	89	21.77	78	2	1	1	2	2	1	1	1	36	4.6	1.1	1.2	2.8	743	432	0	0	1	3	-311	41.8573	2	3	1	2	1	2
479	56	1	110	60	19.92	77	2	1	1	1	1	1	1	1	30	4.3	3.1	0.9	2.6	662	312	0	0	1	3	-350	52.8701	1	3	2	2	1	2
480	74	2	120	80	15.63	74	2	1	1	2	2	2	2	1	35	4.2	1.4	0.9	2.6	681	322	0	0	1	3	-359	52.7166	1	3	1	2	1	2
481	77	2	120	80	19.63	71	2	1	2	1	1	2	2	1	32	4.2	1.1	1.1	2.7	541	214	0	0	1	3	-327	60.4436	1	2	1	2	1	2
482	75	2	139	70	19.14	70	2	1	1	2	2	2	2	2	34	4.2	0.7	2	2	654	286	0	0	1	3	-368	56.2691	1	3	1	2	1	2
483	24	1	90	60	19.1	69	2	1	1	1	2	1	1	1	39	3.7	0.7	0.8	2.4	512	232	0	0	1	3	-280	54.6875	1	2	2	2	1	2
484	85	2	130	70	20.2	76	2	1	1	2	1	2	2	1	28	3.6	4.1	0.5	2.7	654	315	0	0	1	3	-339	51.8349	1	3	1	2	1	2
485	86	2	120	70	20.06	78	2	1	1	1	2	2	2	1	43	4.7	2	0.8	3.1	601	342	0	0	1	3	-259	43.0948	1	2	1	2	2	2
486	88	2	100	70	19.92	70	2	1	2	2	1	2	2	1	40	4.5	1.1	0.9	3	643	312	0	0	1	3	-331	51.4774	1	3	1	2	2	2
487	81	2	130	80	20.2	70	2	1	1	1	1	2	2	1	26	4.8	1.1	1.3	3.1	578	187	0	0	1	3	-391	67.6471	1	2	1	2	1	2
488	92	2	110	60	17.8	74	2	1	2	2	2	2	2	1	45	3.6	1.5	0.7	2.3	632	322	0	0	1	3	-310	49.0506	1	3	1	2	2	2
489	72	2	100	60	19.81	71	2	1	1	2	2	2	2	1	38	4.7	1.6	0.8	3.3	589	245	0	0	1	3	-344	58.4041	1	2	1	2	1	2
490	83	1	120	80	19.1	75	2	1	1	1	1	1	2	1	27	3.3	1.3	0.6	2.3	601	387	0	0	1	3	-214	35.6073	1	2	1	2	1	2
491	86	1	139	89	19.71	70	2	1	1	1	1	2	1	1	35	5.5	1.9	1.2	3.6	542	211	0	0	1	3	-331	61.0701	1	2	1	2	1	2
492	79	1	110	60	19.29	71	2	1	2	2	2	1	1	1	55	1.9	1	0.8	1.1	687	312	0	0	1	3	-375	54.5852	1	3	1	2	2	2
493	72	2	110	60	19.38	74	2	1	2	1	1	2	2	1	31	4.5	1.8	1.4	3.6	652	321	0	0	1	3	-331	50.7669	1	3	1	2	1	2
494	42	1	120	80	19.95	74	2	2	2	2	2	1	1	2	55	1.2	0.8	2.3	2.3	632	231	0	0	1	3	-401	63.4494	1	3	2	2	2	2
495	52	2	130	89	19.57	76	2	1	1	1	1	2	2	1	30	3.8	1.1	0.8	2.2	568	145	0	0	1	3	-423	74.4718	1	2	2	2	1	2
496	63	1	139	89	20.08	80	2	1	1	1	2	1	1	1	48	2.9	1.9	0.7	1.7	612	346	0	0	1	3	-266	43.4641	1	3	1	2	2	2
497	61	2	130	89	19.38	70	2	1	2	2	1	2	2	1	53	4	3.1	1.3	2	512	203	0	0	1	3	-309	60.3516	1	2	1	2	2	2
498	67	2	130	80	19.83	76	2	1	1	1	2	2	2	1	48	3.3	3.3	0.9	1.7	635	356	0	0	1	3	-279	43.937	1	3	1	2	2	2
499	82	1	130	70	19.57	78	2	1	1	1	1	1	1	1	61	4.6	1.8	1.1	2.7	545	243	0	0	1	3	-302	55.4128	1	2	1	2	2	2
500	67	2	139	85	20.06	75	3	1	1	2	2	2	2	1	35	4.9	8	0.9	2.4	721	321	0	0	1	3	-400	55.4785	1	3	1	1	1	2
501	66	2	130	89	19.14	70	2	1	1	1	1	2	2	1	36	6.1	2.7	1	4	499	210	0	0	1	3	-289	57.9158	1	2	1	2	1	2
502	83	1	110	80	19.81	76	2	1	2	1	2	2	1	1	49	3.1	0.7	0.8	2	502	232	0	0	1	3	-270	53.7849	1	2	1	2	2	2
503	86	2	100	60	20.69	74	2	1	1	2	2	2	2	1	42	2.6	1.2	0.7	1.6	597	245	0	0	1	3	-352	58.9615	1	2	1	2	2	2
504	67	1	130	70	20.55	76	2	1	1	1	1	1	1	1	32	7.5	3.5	1	4.8	513	231	0	0	1	3	-282	54.9708	1	2	1	2	1	2
505	83	2	110	70	20.4	76	2	1	1	1	1	2	2	1	23	3.9	1.4	1.1	3	521	327	0	0	1	3	-194	37.2361	1	2	1	2	1	2
506	58	1	120	70	19.13	80	2	1	1	2	2	1	1	1	19	3.6	1.2	0.8	2.8	654	321	0	0	1	3	-333	50.9174	1	3	2	2	1	2
507	50	2	100	60	19.92	79	2	1	1	1	2	2	2	1	40	3.6	1.5	0.9	2.2	686	344	0	0	1	3	-342	49.8542	1	3	2	2	2	2
508	56	1	90	60	19.43	78	2	1	1	1	1	1	1	1	28	3.8	1.01	0.8	2.4	602	354	0	0	1	3	-248	41.196	1	3	2	2	1	2
509	26	1	100	60	16.69	70	2	1	2	2	2	1	1	1	53	4.2	1.3	0.9	2.1	662	365	0	0	1	3	-297	44.864	1	3	2	2	2	2
510	64	1	100	60	17.58	72	2	1	2	2	2	1	1	1	62	2.5	0.9	1	1.4	615	324	0	0	1	3	-291	47.3171	1	3	1	2	2	2
511	65	1	100	60	20.08	79	3	1	1	1	2	1	1	1	37	3.5	1.3	0.9	2.3	717	345	0	0	1	3	-372	51.8828	1	3	1	1	1	2
512	83	2	110	70	18.43	76	2	1	1	2	1	2	2	1	43	4.1	0.9	0.7	3.2	654	342	0	0	1	3	-312	47.7064	1	3	1	2	2	2
513	40	1	110	70	19.83	76	1	1	1	2	2	1	1	1	44	4.6	1.4	1	3.5	579	231	0	0	1	3	-348	60.1036	1	2	2	2	2	2
514	81	2	139	89	21.48	80	1	1	1	2	2	2	2	1	33	2.3	0.6	0.9	1.4	483	136	0	0	1	3	-347	71.8427	1	2	1	2	1	2
515	37	1	100	60	17.75	74	2	1	1	1	1	1	1	1	55	3.4	1.2	0.8	2.1	512	311	0	0	1	3	-201	39.2578	1	2	2	2	2	2
516	79	1	100	60	15.82	71	2	1	1	2	2	1	2	1	52	4.1	0.8	1.1	2.6	532	245	0	0	1	3	-287	53.9474	1	2	1	2	2	2
517	68	2	130	70	21.08	80	2	1	1	2	2	2	2	1	29	6	3.4	0.9	3.1	654	412	0	0	1	3	-242	37.0031	2	3	1	2	1	2
518	75	2	130	70	19.92	76	2	1	1	1	1	2	2	1	26	6.6	0.9	1.1	4.9	546	301	0	0	1	3	-245	44.8718	1	2	1	2	1	2
519	73	2	100	60	20.7	79	2	1	1	2	2	2	2	1	46	2.9	1.5	0.8	1.4	632	321	0	0	1	3	-311	49.2089	1	3	1	2	2	2
520	62	1	100	60	20.96	78	2	1	1	2	2	1	1	1	47	3.8	1.3	0.8	2.3	668	341	0	0	1	3	-327	48.9521	1	3	1	2	2	2
521	64	2	100	60	17.48	70	2	1	1	2	2	2	2	2	38	2.9	0.5	1.1	1.9	579	212	0	0	1	3	-367	63.3851	1	2	1	2	1	2
522	84	1	130	70	19.42	78	2	1	1	1	1	1	1	1	51	3.3	0.7	0.9	2.1	563	312	0	0	1	3	-251	44.5826	1	2	1	2	2	2
523	64	1	120	70	18.9	73	2	1	1	1	1	1	1	1	43	3.4	0.6	0.9	2.2	654	231	0	0	1	3	-423	64.6789	1	3	1	2	2	2
524	84	2	110	60	17.8	71	1	1	1	2	2	2	2	2	60	3.8	1.1	1.1	2.3	497	187	0	0	1	3	-310	62.3742	1	2	1	2	2	2
525	63	1	130	70	19.71	79	2	1	1	1	1	1	1	1	32	8	3	1.9	4.9	569	213	0	0	1	3	-356	62.5659	1	2	1	2	1	2
526	47	2	100	60	20.66	76	2	1	1	1	2	2	2	1	37	4	1	1	2.7	651	232	0	0	1	3	-419	64.3625	1	3	2	2	1	2
527	75	1	125	75	19.81	80	2	1	1	2	2	1	2	1	42	4.7	1.1	1	3.3	666	314	0	0	1	3	-352	52.8529	1	3	1	2	2	2
528	53	1	120	70	19.29	74	2	1	2	1	2	1	1	1	40	3	0.6	0.6	2	634	235	0	0	1	3	-399	62.9338	1	3	2	2	2	2
529	86	1	90	60	21.72	80	2	1	2	2	1	1	1	1	36	3	1	1	1.3	598	211	0	0	1	3	-387	64.7157	1	2	1	2	1	2
530	75	1	110	70	22.06	75	2	1	1	2	2	1	1	2	65	2.8	0.7	1.2	1.6	641	324	0	0	1	3	-317	49.454	1	3	1	2	2	2
531	85	1	120	80	15.82	72	2	1	1	2	2	1	1	2	24	4.3	1.4	1.2	2.5	596	236	0	0	1	3	-360	60.4027	1	2	1	2	1	2
532	76	1	90	60	20.2	76	2	1	1	1	1	1	1	1	49	3.1	1.8	0.6	1.9	485	177	0	0	1	3	-308	63.5052	1	2	1	2	2	2
533	91	2	110	60	18.03	76	2	1	2	2	2	2	2	1	59	3.1	1.4	0.6	1.8	653	233	0	0	1	3	-420	64.3185	1	3	1	2	2	2
534	50	1	100	60	19.1	82	2	1	2	2	2	2	1	1	51	4.4	1.1	1.2	2.9	612	311	0	0	1	3	-301	49.183	1	3	2	2	2	2
535	61	1	100	60	20.08	79	2	1	1	1	2	1	1	1	45	2.3	0.7	0.8	1.1	544	302	0	0	1	3	-242	44.4853	1	2	1	2	2	2
536	75	2	120	70	20.55	76	2	1	1	2	2	2	2	1	37	4.9	2.1	0.8	3.3	652	298	0	0	1	3	-354	54.2945	1	3	1	2	1	2
537	91	1	120	70	16.61	71	2	1	1	1	2	1	1	1	54	4.5	1	1.2	2.7	568	288	0	0	1	3	-280	49.2958	1	2	1	2	2	2
538	91	1	120	70	20.08	80	2	1	1	2	2	1	1	2	34	3.7	1.3	1.1	2.2	665	351	0	0	1	3	-314	47.218	1	3	1	2	1	2
539	85	2	139	80	19.38	74	1	1	1	1	1	2	2	1	39	3.2	0.9	0.5	2	546	211	0	0	1	3	-335	61.3553	1	2	1	2	1	2
540	80	2	110	80	17.07	71	2	1	1	1	1	2	2	1	38	4.2	1.9	1.1	2.4	557	239	0	0	1	3	-318	57.0916	1	2	1	2	1	2
541	78	2	110	70	20.81	72	2	1	1	2	2	2	2	1	24	4.8	2	0.8	3.3	514	222	0	0	1	3	-292	56.8093	1	2	1	2	1	2
542	81	1	130	80	19.49	74	2	1	1	2	1	1	1	1	43	4.4	2.3	1	2.7	632	297	0	0	1	3	-335	53.0063	1	3	1	2	2	2
543	60	1	100	60	19.05	76	1	1	1	1	2	1	1	1	33	3.6	1.6	0.6	2.5	548	223	0	0	1	3	-325	59.3066	1	2	1	2	1	2
544	67	2	130	80	18.31	70	2	1	1	2	2	2	2	1	22	4.4	0.8	1.3	2.8	675	344	0	0	1	3	-331	49.037	1	3	1	2	1	2
545	48	2	110	70	19.22	71	1	1	1	1	1	2	2	1	48	2.4	1	0.5	1.2	469	289	0	0	1	3	-180	38.3795	1	2	2	2	2	2
546	58	1	120	70	18.87	74	3	2	2	2	2	2	1	2	40	3.5	1.1	1.1	2.1	713	309	0	0	1	3	-404	56.662	1	3	2	1	2	2
547	81	1	130	80	17.75	71	1	1	2	1	1	1	1	1	43	3.8	2.1	1	2	539	278	0	0	1	3	-261	48.423	1	2	1	2	2	2
548	81	1	110	80	18.87	75	2	1	1	1	1	1	2	1	47	3	0.8	0.9	1.7	588	232	0	0	1	3	-356	60.5442	1	2	1	2	2	2
549	85	2	130	80	17.8	71	2	1	1	2	2	2	2	2	42	3.5	1.4	1.1	2.1	511	235	0	0	1	3	-276	54.0117	1	2	1	2	2	2
550	38	1	130	80	18.56	89	2	1	2	1	1	1	1	1	39	2.3	1	0.6	1.5	686	268	0	0	1	3	-418	60.9329	1	3	2	2	1	2
551	76	2	90	60	19.4	74	2	1	1	1	1	2	2	1	35	4	0.6	0.9	2.9	668	269	0	0	1	3	-399	59.7305	1	3	1	2	1	2
552	60	2	100	60	20.24	75	2	1	2	2	2	2	2	1	37	4.6	1.1	1	3.3	554	209	0	0	1	3	-345	62.2744	1	2	1	2	1	2
553	63	1	130	80	19.84	79	2	1	2	1	1	1	1	1	32	4.4	3.4	1	2.7	653	321	0	0	1	3	-332	50.8423	1	3	1	2	1	2
554	81	1	139	89	18.87	75	3	1	2	2	2	1	1	1	36	3.5	1.3	1	2.1	768	387	0	0	1	3	-381	49.6094	1	3	1	1	1	2
555	86	2	120	80	15.18	69	2	1	1	1	1	2	2	1	38	2.7	1.4	0.6	1.8	659	267	0	0	1	3	-392	59.4841	1	3	1	2	1	2
556	77	2	120	70	21.8	70	2	1	2	2	1	2	2	1	35	4	2	0.6	2.7	642	265	0	0	1	3	-377	58.7227	1	3	1	2	1	2
557	80	2	110	75	17.22	72	2	1	2	2	2	2	2	1	37	3.5	1	0.9	2.3	554	272	0	0	1	3	-282	50.9025	1	2	1	2	1	2
558	56	2	120	75	19.1	70	2	1	2	2	2	2	2	1	35	3.9	1.2	0.5	2.8	698	342	0	0	1	3	-356	51.0029	1	3	2	2	1	2
559	90	2	120	80	19.96	78	2	1	2	1	1	2	2	1	31	2.3	0.7	0.9	1.2	656	265	0	0	1	3	-391	59.6037	1	3	1	2	1	2
560	52	2	139	89	16.87	72	3	1	2	1	2	2	2	1	33	3	0.6	0.9	1.9	621	214	0	0	1	3	-407	65.5395	1	3	2	1	1	2
561	44	1	120	70	24	78	2	1	2	1	1	1	1	1	38	4.4	4.8	1.6	2.7	564	198	0	0	1	3	-366	64.8936	1	2	2	2	1	2
562	45	1	130	85	21.09	78	2	1	2	1	2	1	1	1	40	5.2	1.2	1	3.7	657	200	0	0	1	3	-457	69.5586	1	3	2	2	2	2
563	29	1	125	75	22.23	74	2	1	2	2	1	1	1	1	39	4	1.4	1	2.6	604	265	0	0	1	3	-339	56.1258	1	3	2	2	1	2
564	57	1	100	60	21.01	78	2	1	2	1	1	1	1	1	36	3.1	1.2	0.6	2.1	668	301	0	0	1	3	-367	54.9401	1	3	2	2	1	2
565	75	1	130	80	21.76	74	3	1	2	1	1	1	2	1	38	4.8	1.2	1	3.2	743	301	0	0	1	3	-442	59.4886	1	3	1	1	1	2
566	55	2	130	89	18.75	74	2	1	2	2	1	2	2	1	40	5.6	0.9	1.5	3.5	542	215	0	0	1	3	-327	60.3321	1	2	2	2	2	2
567	84	2	110	70	18.03	71	2	1	1	1	2	2	2	1	35	3.7	1.1	0.7	2.4	632	287	0	0	1	3	-345	54.5886	1	3	1	2	1	2
568	78	2	110	60	18.97	70	2	1	2	1	2	2	2	1	34	5.5	1.6	0.8	3.7	673	358	0	0	1	3	-315	46.8053	1	3	1	2	1	2
569	85	2	130	80	16.02	69	2	1	1	2	1	2	2	1	36	5.3	3.7	0.6	3.3	602	245	0	0	1	3	-357	59.3023	1	3	1	2	1	2
570	62	2	110	70	19.6	74	2	1	2	1	2	2	2	1	38	5.4	1.7	1.1	3.8	532	216	0	0	1	3	-316	59.3985	1	2	1	2	1	2
571	64	2	120	70	10.76	75	2	1	2	1	1	2	2	1	38	5.6	1.9	1.2	3.8	499	241	0	0	1	3	-258	51.7034	1	2	1	2	1	2
572	55	1	100	60	19.72	71	2	1	2	2	1	2	1	1	37	2.7	1	0.8	1.6	566	214	0	0	1	3	-352	62.1908	1	2	2	2	1	2
573	64	2	120	70	19.13	72	2	1	2	1	1	2	2	1	18	3.4	1.2	0.7	2.4	656	311	0	0	1	3	-345	52.5915	1	3	1	2	1	2
574	91	1	120	60	19.26	75	1	1	1	1	2	1	1	1	25	7.4	1.1	1.7	5.1	531	213	0	0	1	3	-318	59.887	1	2	1	2	1	2
575	90	2	90	60	18.99	72	2	1	2	1	1	2	2	1	32	3.7	0.8	0.8	2.6	542	211	0	0	1	3	-331	61.0701	1	2	1	2	1	2
576	69	2	130	80	18.75	72	2	1	2	1	1	2	2	1	36	5.8	2.9	0.8	3.9	632	341	0	0	1	3	-291	46.0443	1	3	1	2	1	2
577	54	1	110	70	19.78	77	2	1	2	2	1	1	1	1	38	2.2	0.6	0.8	1.3	524	214	0	0	1	3	-310	59.1603	1	2	2	2	1	2
578	58	1	110	70	18.42	72	2	1	2	1	2	1	1	1	34	4.1	1.2	0.9	2.7	654	288	0	0	1	3	-366	55.9633	1	3	2	2	1	2
579	37	1	120	80	21.8	72	2	1	1	2	2	1	1	1	31	5.8	1.8	1.2	3.9	663	252	0	0	1	3	-411	61.991	1	3	2	2	1	2
580	36	1	120	80	18.37	88	2	1	2	1	1	1	1	1	40	7.1	1.9	1.7	4.6	568	211	0	0	1	3	-357	62.8521	1	2	2	2	2	2
581	73	2	100	60	18.97	75	2	1	1	1	2	2	2	1	25	5.8	2.9	1.4	3.4	620	311	0	0	1	3	-309	49.8387	1	3	1	2	1	2
582	79	2	100	60	20.81	75	1	1	2	2	1	2	2	1	23	16.8	8.7	1.7	9	520	177	0	0	1	3	-343	65.9615	1	2	1	2	1	2
583	68	2	110	70	19.96	78	1	1	2	1	1	2	2	1	38	3.6	1	1	2.8	442	165	0	0	1	3	-277	62.6697	1	1	1	2	1	2
584	58	1	135	85	18.78	76	2	1	2	1	1	1	1	1	22	6.1	1.3	1.7	3.8	552	232	0	0	1	3	-320	57.971	1	2	2	2	1	2
585	84	2	110	80	15.82	69	2	1	1	1	1	2	2	1	30	4.9	0.9	1.1	3	562	311	0	0	1	3	-251	44.6619	1	2	1	2	1	2
586	67	2	110	80	21.22	70	2	1	1	1	1	2	2	1	40	2.6	1	0.8	1.6	632	244	0	0	1	3	-388	61.3924	1	3	1	2	2	2
587	82	2	100	70	18.03	72	2	1	2	1	1	2	2	1	33	3.9	1.5	0.9	2.4	546	214	0	0	1	3	-332	60.8059	1	2	1	2	1	2
588	60	1	110	80	19.59	76	2	1	2	2	2	1	1	1	29	7.1	1.2	1.7	4.4	521	246	0	0	1	3	-275	52.7831	1	2	1	2	1	2
589	81	2	120	80	19.36	75	2	1	1	1	2	2	2	1	28	5.8	6.2	0.8	3.3	533	197	0	0	1	3	-336	63.0394	1	2	1	2	1	2
590	66	1	135	85	19.88	86	2	1	2	2	1	1	1	1	27	4.2	0.7	1.1	2.7	632	268	0	0	1	3	-364	57.5949	1	3	1	2	1	2
591	42	1	110	80	21.67	78	2	1	1	1	2	1	1	1	30	4.4	2.9	1	2.7	564	207	0	0	1	3	-357	63.2979	1	2	2	2	1	2
592	69	1	130	85	21.22	79	2	1	2	1	1	1	1	1	28	4.1	2	0.6	2.8	531	236	0	0	1	3	-295	55.5556	1	2	1	2	1	2
593	76	2	120	80	18.6	73	2	1	2	2	2	2	2	1	37	4.6	1.9	0.9	3.3	662	314	0	0	1	3	-348	52.568	1	3	1	2	1	2
594	60	1	120	70	22.23	75	2	1	2	2	1	2	1	1	31	4.3	1.4	1	2.7	562	296	0	0	1	3	-266	47.331	1	2	1	2	1	2
595	52	1	100	60	21.11	79	2	1	2	1	2	1	1	1	29	5.6	1.3	1.2	3.7	512	274	0	0	1	3	-238	46.4844	1	2	2	2	1	2
596	67	1	120	80	18.2	72	2	1	1	1	1	1	1	1	33	6.3	2.2	1.3	4.2	668	286	0	0	1	3	-382	57.1856	1	3	1	2	1	2
597	82	2	110	60	20.23	71	1	1	2	1	1	2	2	1	38	2.6	1.2	0.6	1.7	411	201	1	0	0	1	-210	51.0949	1	1	1	2	1	2
598	68	1	120	80	21.01	75	1	1	2	1	1	1	2	1	40	3	1.5	0.8	1.7	235	198	0	1	0	2	-37	15.7447	1	1	1	2	2	2
599	72	1	120	65	19.53	71	2	1	1	2	1	1	1	1	40	4.2	1.7	1.2	2.7	368	199	0	0	1	3	-169	45.9239	1	1	1	2	2	2
600	81	2	120	80	16.23	70	1	1	2	1	2	2	2	1	39	3.9	1.5	1	2.7	398	201	0	1	0	2	-197	49.4975	1	1	1	2	1	2
601	79	1	100	60	19.84	72	1	1	2	2	1	1	1	1	32	4.7	1.3	1	3.3	311	205	1	0	0	1	-106	34.0836	1	1	1	2	1	2
602	48	2	120	80	18.21	72	2	1	2	1	2	2	2	1	25	3.9	1.7	0.9	2.3	411	221	0	0	1	3	-190	46.2287	1	1	2	2	1	2
603	76	1	120	70	20.55	76	1	1	1	2	2	1	1	1	26	6.4	2.5	1.2	4.2	260	199	0	1	0	2	-61	23.4615	1	1	1	2	1	2
604	47	1	110	70	22.39	73	1	1	2	1	2	1	1	1	29	3.8	1.2	1	2.6	400	235	0	1	0	2	-165	41.25	1	1	2	2	1	2
605	87	1	110	80	19.63	76	1	1	2	1	2	1	1	1	33	2.4	0.7	0.7	1.7	411	257	1	0	0	1	-154	37.4696	1	1	1	2	1	2
606	66	1	110	70	18.83	71	1	1	2	1	1	1	1	1	34	4.3	2.1	0.8	2.7	300	189	0	0	1	3	-111	37	1	1	1	2	1	2
607	81	1	130	80	19.88	72	1	1	2	1	2	1	2	1	33	5	1.6	1.3	3	407	245	1	0	0	1	-162	39.8034	1	1	1	2	1	2
608	60	1	130	80	22.31	89	1	1	2	1	1	1	1	1	35	3.7	3.1	1	2	296	178	0	0	1	3	-118	39.8649	1	1	1	2	1	2
609	77	2	110	70	15.81	70	1	1	2	1	1	2	2	1	31	5.6	1.3	1.3	3.6	378	202	0	1	0	2	-176	46.5608	1	1	1	2	1	2
610	40	2	110	70	19.47	76	1	1	2	1	2	2	2	1	30	4.2	1.7	1	2.7	233	168	0	0	1	3	-65	27.897	1	1	2	2	1	2
611	69	1	120	80	20.18	76	1	1	2	1	2	1	1	1	37	2.7	0.8	1	1.5	295	200	1	0	0	1	-95	32.2034	1	1	1	2	1	2
612	57	2	100	60	19.63	71	1	1	2	1	2	2	2	1	24	2.3	1.5	0.7	1.3	278	199	0	1	0	2	-79	28.4173	1	1	2	2	1	2
613	60	2	100	60	18.67	73	2	1	2	1	2	2	2	1	23	5.2	4.1	0.9	3.3	414	238	1	0	0	1	-176	42.5121	1	1	1	2	1	2
614	86	1	100	60	23.44	78	2	1	2	1	2	1	1	1	25	3.4	1	0.8	2	328	166	0	0	1	3	-162	49.3902	1	1	1	2	1	2
615	70	2	100	60	19.61	72	2	1	2	1	2	2	2	1	37	4.7	1.7	1	3	412	266	0	1	0	2	-146	35.4369	1	1	1	2	1	2
616	81	2	110	60	18.7	72	1	1	1	1	1	2	2	1	38	2.6	0.8	0.8	1.6	276	168	1	0	0	1	-108	39.1304	1	1	1	2	1	2
617	69	2	90	60	20.13	76	1	1	2	1	2	2	2	1	40	7	2.2	1.2	4.8	290	189	0	1	0	2	-101	34.8276	1	1	1	2	2	2
618	84	2	100	60	22.76	78	2	1	2	1	2	2	2	1	40	3	1.1	0.9	1.9	413	2202	0	0	1	3	1789	-433.172	2	1	1	2	2	2
619	58	1	100	60	21.3	88	2	1	2	1	2	1	1	1	36	2.5	1.1	0.8	1.5	400	232	0	1	0	2	-168	42	1	1	2	2	1	2
620	65	1	110	60	22.59	76	2	1	2	1	2	1	1	1	34	4.4	3.6	0.9	2.7	312	197	0	0	1	3	-115	36.859	1	1	1	2	1	2
621	61	1	100	60	17.09	68	1	1	1	1	2	1	2	1	38	2	0.8	0.6	1.1	309	194	1	0	0	1	-115	37.2168	1	1	1	2	1	2
622	78	2	120	80	22.1	70	1	1	2	1	1	2	2	1	33	4.8	4.6	0.9	2.8	297	178	0	1	0	2	-119	40.0673	1	1	1	2	1	2
623	77	2	110	75	18.49	73	1	1	2	1	2	2	2	1	32	4.3	1.2	1.2	2.6	397	168	1	0	0	1	-229	57.6826	1	1	1	2	1	2
624	72	1	120	80	21.22	72	2	1	2	1	1	1	2	1	20	4.6	3.4	0.7	2.9	312	204	0	0	1	3	-108	34.6154	1	1	1	2	1	2
625	61	2	120	80	20.7	77	1	1	2	1	2	2	2	1	24	6.2	1.8	1.1	4.1	275	168	1	0	0	1	-107	38.9091	1	1	1	2	1	2
626	76	1	110	60	23.73	78	1	1	1	1	1	1	1	1	30	3.9	1	1	2.5	286	168	0	1	0	2	-118	41.2587	1	1	1	2	1	2
627	55	2	135	85	18.26	74	1	1	2	1	2	2	2	1	27	6.4	0.9	0.9	4.7	315	179	0	0	1	3	-136	43.1746	1	1	2	2	1	2
628	64	1	130	85	21.34	79	1	1	2	1	2	1	1	1	26	5.2	1.3	1.7	3	312	187	1	0	0	1	-125	40.0641	1	1	1	2	1	2
629	51	1	125	75	22.15	73	1	1	2	1	1	2	1	1	34	4.3	1	1	3	396	197	0	1	0	2	-199	50.2525	1	1	2	2	1	2
630	67	2	130	80	18.2	75	1	1	2	1	2	2	2	1	30	2.4	1	0.7	1.5	269	154	0	0	1	3	-115	42.7509	1	1	1	2	1	2
631	86	2	110	60	22.03	72	1	1	1	1	2	2	2	1	32	3.9	0.8	0.9	3	412	267	0	1	0	2	-145	35.1942	1	1	1	2	1	2
632	88	2	110	65	21.08	71	1	1	1	1	2	2	2	1	40	3	2.3	0.8	1.7	391	198	1	0	0	1	-193	49.3606	1	1	1	2	2	2
633	41	2	120	75	19.2	73	1	1	2	1	2	2	2	1	35	3.1	1	0.9	1.8	410	246	0	1	0	2	-164	40	1	1	2	2	1	2
634	84	2	125	75	22.31	75	2	1	1	1	2	2	2	1	37	3.3	2.4	0.6	2.2	315	168	0	0	1	3	-147	46.6667	1	1	1	2	1	2
635	53	1	100	60	20.78	67	1	1	1	1	1	1	1	1	34	3.7	0.7	0.8	1.7	325	196	1	0	1	1	-129	39.6923	1	1	2	2	1	2
636	55	1	100	60	21.97	73	1	1	2	1	1	1	2	1	39	5.6	2	1	3.7	286	198	0	1	0	2	-88	30.7692	1	1	2	2	1	2
637	77	2	110	70	20.7	76	1	1	2	1	2	2	2	1	38	6.3	2.8	1.3	4.2	299	185	0	0	1	3	-114	38.1271	1	1	1	2	1	2
638	42	1	100	60	22.59	77	1	1	2	1	1	1	1	1	33	4.6	1.9	1.2	2.8	353	199	0	1	0	2	-154	43.6261	1	1	2	2	1	2
639	63	2	120	70	20.86	75	2	1	2	1	1	2	2	1	32	6	0.9	1.4	4.1	414	264	0	0	1	3	-150	36.2319	1	1	1	2	1	2
640	81	2	120	80	21.97	70	1	1	2	1	2	2	2	1	34	4.7	2	1.3	2.9	312	164	1	0	0	1	-148	47.4359	1	1	1	2	1	2
641	75	2	90	60	20.4	73	1	1	2	1	1	2	2	1	30	3	0.6	1	1.7	266	171	1	0	0	1	-95	35.7143	1	1	1	2	1	2
642	44	1	100	60	20.8	74	1	1	2	1	2	1	1	1	29	6.8	1.9	1.6	4.2	344	196	0	1	0	2	-148	43.0233	1	1	2	2	1	2
643	86	1	120	80	22	80	1	1	2	1	2	2	2	1	34	3.6	1.6	0.9	2.2	386	198	0	0	1	3	-188	48.7047	1	1	1	2	1	2
644	61	1	100	60	22.1	77	2	1	2	1	2	2	1	1	35	5	1.2	0.9	3.2	415	217	0	1	0	2	-198	47.7108	1	1	1	2	1	2
645	52	1	140	90	23	92	1	1	2	1	2	1	1	1	25	4.4	1.9	1	2.9	241	183	0	0	1	3	-58	24.0664	1	1	2	2	1	2
646	73	1	180	120	32	110	2	1	2	1	1	2	2	2	23	3.1	0.7	1.8	1.2	327	190	1	0	0	1	-137	41.896	1	1	1	2	1	1
647	57	1	110	80	26	95	1	2	1	2	2	2	1	1	38	3	0.6	0.6	2.1	321	211	1	0	0	1	-110	34.2679	1	1	2	2	1	1
648	85	2	190	120	26	96	1	1	1	1	2	2	2	1	22	4.3	1.3	1.2	2.8	347	211	0	1	0	2	-136	39.1931	1	1	1	2	1	1
649	56	2	140	90	22	77	1	1	2	1	2	2	2	1	30	4.8	2.3	0.7	3	312	192	0	0	1	3	-120	38.4615	1	1	2	2	1	2
650	80	2	170	110	21	87	1	1	2	1	2	2	2	1	40	4.6	1.1	1.2	2.8	266	187	1	0	0	1	-79	29.6992	1	1	1	2	2	2
651	75	2	200	120	19	79	1	1	2	2	2	2	2	1	33	4.3	3.1	0.9	2.6	289	190	0	1	0	2	-99	34.2561	1	1	1	2	1	2
652	50	2	120	70	24	90	1	2	2	1	2	2	2	1	29	4.2	1.4	0.9	2.6	346	201	0	0	1	3	-145	41.9075	1	1	2	2	1	2
653	80	1	130	90	23	91	1	2	1	1	2	2	1	1	28	4.2	1.1	1.1	2.7	324	200	1	0	0	1	-124	38.2716	1	1	1	2	1	2
654	78	2	150	90	26	100	1	1	2	1	2	2	2	2	27	3.5	1.1	1.2	2	368	198	0	1	0	2	-170	46.1957	1	1	1	2	1	1
655	87	2	160	100	28	92	2	1	2	2	2	2	2	1	30	3.7	0.7	0.8	2.4	314	196	0	0	1	3	-118	37.5796	1	1	1	2	1	1
656	64	1	120	70	26	98	1	2	1	1	2	1	1	1	28	3.6	4.1	0.5	2.7	268	184	0	1	0	2	-84	31.3433	1	1	1	2	1	1
657	66	1	170	90	19	69	1	1	1	2	2	2	2	2	37	3.5	0.9	1.1	2	287	169	1	0	0	1	-118	41.115	1	1	1	2	1	2
658	78	2	100	60	27	98	1	2	1	1	2	2	2	1	31	4.7	2	0.8	3.1	264	146	0	0	1	3	-118	44.697	1	1	1	2	1	1
659	56	2	120	70	28	90	1	2	2	1	1	2	2	2	29	2.9	0.9	1.2	1.4	276	199	1	0	0	1	-77	27.8986	1	1	2	2	1	1
660	64	1	150	90	24	88	1	1	1	2	2	2	1	1	33	4.5	1.1	0.9	3	288	166	0	1	0	2	-122	42.3611	1	1	1	2	1	2
661	74	1	130	70	20	89	1	2	2	2	2	2	2	1	38	4.8	1.1	1.3	3.1	348	200	0	0	1	3	-148	42.5287	1	1	1	2	1	2
662	46	2	110	60	17	75	1	2	2	1	2	2	2	1	40	3.6	1.5	0.7	2.3	289	177	0	1	0	2	-112	38.7543	1	1	2	2	2	2
663	70	1	100	60	20	84	1	2	2	2	2	2	2	1	40	4.7	1.6	0.8	3.3	299	189	0	0	1	3	-110	36.7893	1	1	1	2	2	2
664	48	2	110	70	21	68	1	2	2	2	2	2	2	1	39	3.3	1.3	0.6	2.3	346	198	1	0	0	1	-148	42.7746	1	1	2	2	1	2
665	69	1	150	90	24	90	1	1	2	2	1	1	1	2	32	4.1	1.2	1.2	2.4	386	211	1	0	0	1	-175	45.3368	1	1	1	2	1	2
666	83	2	150	100	28	94	1	1	2	1	2	2	2	1	25	5.5	1.9	1.2	3.6	379	178	0	1	0	2	-201	53.0343	1	1	1	2	1	1
667	54	2	170	100	26	92	2	1	1	1	2	2	2	1	26	1.9	1	0.8	1.1	412	237	0	0	1	3	-175	42.4757	1	1	2	2	1	1
668	62	1	110	60	21	86	1	2	1	2	2	2	1	1	29	4.5	1.8	1.4	3.6	356	231	0	0	1	3	-125	35.1124	1	1	1	2	1	2
669	59	1	120	70	20	90	1	2	1	1	2	2	1	1	33	3.8	1.1	0.8	2.2	268	166	0	1	0	2	-102	38.0597	1	1	2	2	1	2
670	72	1	130	80	25	92	1	2	2	2	2	2	2	1	34	2.9	1.9	0.7	1.7	333	196	1	0	0	1	-137	41.1411	1	1	1	2	1	1
671	73	2	140	80	18	80	2	1	1	1	2	2	1	1	33	4	3.1	1.3	2	312	211	1	0	0	1	-101	32.3718	1	1	1	2	1	2
672	79	1	160	100	20	81	1	1	2	2	2	2	2	1	35	3.3	3.3	0.9	1.7	390	197	0	1	0	2	-193	49.4872	1	1	1	2	1	2
673	72	2	180	110	22	93	1	1	2	2	2	2	2	1	31	4.6	1.8	1.1	2.7	348	201	0	0	1	3	-147	42.2414	1	1	1	2	1	2
674	55	2	120	80	24	95	1	2	1	1	2	2	2	1	30	4.9	8	0.9	2.4	226	166	0	1	0	2	-60	26.5487	1	1	2	2	1	2
675	61	1	140	90	23	90	1	1	2	2	2	1	1	1	37	6.1	2.7	1	4	338	168	1	0	0	1	-170	50.2959	1	1	1	2	1	2
676	78	2	150	90	26	108	1	1	1	1	2	2	2	1	24	3.1	0.7	0.8	2	379	179	0	0	1	3	-200	52.7704	1	1	1	2	1	1
677	64	2	160	100	19	86	2	1	2	2	2	2	2	1	23	2.6	1.2	0.7	1.6	412	318	1	0	0	1	-94	22.8155	1	1	1	2	1	2
678	77	2	170	100	17	87	1	1	1	1	2	2	2	1	25	7.5	3.5	1	4.8	321	213	0	1	0	2	-108	33.6449	1	1	1	2	1	2
679	41	1	150	90	26	99	1	1	2	2	2	2	1	1	37	3.9	1.4	1.1	3	226	168	0	0	1	3	-58	25.6637	1	1	2	2	1	1
680	51	1	110	60	20	76	2	2	2	2	2	2	1	1	38	3.6	1.2	0.8	2.8	408	203	1	0	0	1	-205	50.2451	1	1	2	2	1	2
681	62	1	140	90	27	95	2	1	2	1	2	2	1	1	40	3.6	1.5	0.9	2.2	314	179	0	1	0	2	-135	42.9936	1	1	1	2	2	1
682	64	1	150	80	25	90	1	1	2	2	2	2	1	1	40	3.8	1.01	0.8	2.4	225	189	0	0	1	3	-36	16	1	1	1	2	2	1
683	66	1	130	90	22	87	1	2	1	1	2	2	2	1	36	4.2	1.3	0.9	2.1	268	186	1	0	0	1	-82	30.597	1	1	1	2	1	2
684	75	2	160	90	28	92	1	1	1	2	1	2	2	1	34	2.5	0.9	1	1.4	299	178	1	0	0	1	-121	40.4682	1	1	1	2	1	1
685	56	1	180	100	21	89	1	1	2	2	2	1	2	1	38	3.5	1.3	0.9	2.3	326	197	0	1	0	2	-129	39.5706	1	1	2	2	1	2
686	72	2	170	90	29	94	1	1	2	1	2	2	2	1	33	4.1	0.9	0.7	3.2	356	201	0	0	1	3	-155	43.5393	1	1	1	2	1	1
687	70	2	140	90	18	80	2	1	2	2	2	2	2	1	32	4.6	1.4	1	3.5	415	268	0	0	1	3	-147	35.4217	1	1	1	2	1	2
688	75	1	150	90	17	89	2	1	1	1	2	1	1	1	20	2.3	0.6	0.9	1.4	311	200	1	0	0	1	-111	35.6913	1	1	1	2	1	2
689	77	1	160	110	27	97	1	1	1	2	2	2	1	1	24	3.4	1.2	0.8	2.1	288	166	0	1	0	2	-122	42.3611	1	1	1	2	1	1
690	64	1	100	60	26	95	1	2	2	1	2	1	1	2	30	4.2	1.6	1.1	2.5	345	189	1	0	0	1	-156	45.2174	1	1	1	2	1	1
691	71	1	170	110	19	87	1	1	1	2	1	2	1	1	27	4.1	0.8	1.1	2.6	286	198	0	1	0	2	-88	30.7692	1	1	1	2	1	2
692	75	1	140	90	18	76	1	1	1	1	2	2	2	1	26	6	3.4	0.9	3.1	366	188	0	0	1	3	-178	48.6339	1	1	1	2	1	2
693	67	2	140	80	24	93	1	1	2	2	2	2	2	1	34	6.6	0.9	1.1	4.9	399	216	0	1	0	2	-183	45.8647	1	1	1	2	1	2
694	67	2	170	90	20	89	1	1	2	2	2	1	2	1	30	2.9	1.5	0.8	1.4	247	198	1	0	0	1	-49	19.8381	1	1	1	2	1	2
695	55	2	110	60	21	84	1	2	2	2	2	2	2	1	32	3.8	1.3	0.8	2.3	348	201	0	0	1	3	-147	42.2414	1	1	2	2	1	2
696	69	2	150	80	26	76	1	1	2	2	2	2	2	1	40	3.3	0.7	0.9	2.1	397	189	1	0	0	1	-208	52.3929	1	1	1	2	2	1
697	62	1	160	100	17	79	2	1	2	2	2	2	1	2	35	3.4	1.1	1.1	1.8	311	200	0	1	0	2	-111	35.6913	1	1	1	2	1	2
698	84	2	130	90	24	82	1	1	1	1	1	2	2	1	37	3.4	0.6	0.9	2.2	397	198	0	0	1	3	-199	50.1259	1	1	1	2	1	2
699	75	2	160	100	23	90	1	1	2	2	2	2	2	1	34	8	3	1.9	4.9	231	168	1	0	0	1	-63	27.2727	1	1	1	2	1	2
700	63	2	150	90	30	97	1	1	2	2	2	2	2	1	39	4	1	1	2.7	286	166	0	0	1	3	-120	41.958	1	1	1	2	1	1
701	56	2	100	60	31	95	1	2	2	2	2	2	2	1	38	4.7	1.1	1	3.3	264	197	0	1	0	2	-67	25.3788	1	1	2	2	1	1
702	65	1	110	70	28	90	1	2	2	2	2	1	1	1	33	3	0.6	0.6	2	336	197	1	0	0	1	-139	41.369	1	1	1	2	1	1
703	74	2	130	70	23	96	1	2	2	1	2	2	2	1	32	3	1	1	1.3	399	198	0	1	0	2	-201	50.3759	1	1	1	2	1	2
704	69	2	140	90	22	79	2	1	1	2	2	2	2	1	34	3.1	1.8	0.6	1.9	400	231	0	0	1	3	-169	42.25	1	1	1	2	1	2
705	68	2	160	100	22	82	2	2	1	1	1	2	2	1	30	3.1	1.4	0.6	1.8	302	190	0	1	0	2	-112	37.0861	1	1	1	2	1	2
706	56	2	120	70	18	87	2	2	2	2	2	2	2	1	29	4.4	1.1	1.2	2.9	397	189	1	0	0	1	-208	52.3929	1	1	2	2	1	2
707	67	1	100	60	29	97	1	2	2	2	2	1	1	1	34	2.3	0.7	0.8	1.1	268	182	1	0	0	1	-86	32.0896	1	1	1	2	1	1
708	71	2	120	70	21	79	1	2	2	2	2	2	2	1	35	4.9	2.1	0.8	3.3	289	168	0	0	1	3	-121	41.8685	1	1	1	2	1	2
709	68	1	130	80	17	76	1	2	2	2	2	2	1	1	30	4.5	1	1.2	2.7	367	196	0	1	0	2	-171	46.594	1	1	1	2	1	2
710	65	2	170	90	27	96	1	1	2	1	1	2	2	1	21	3.2	0.9	0.5	2	284	187	1	0	0	1	-97	34.1549	1	1	1	2	1	1
711	75	2	120	70	28	110	1	2	2	1	2	2	2	1	30	4.2	1.9	1.1	2.4	266	168	0	1	0	2	-98	36.8421	1	1	1	2	1	1
712	52	1	150	90	31	98	1	1	1	2	2	2	1	1	22	4.8	2	0.8	3.3	389	211	0	0	1	3	-178	45.7584	1	1	2	2	1	1
713	56	2	160	100	23	90	1	1	2	2	2	2	2	1	27	4.4	2.3	1	2.7	349	178	1	0	0	1	-171	48.9971	1	1	2	2	1	2
714	49	1	140	90	22	81	1	1	2	2	2	1	2	1	28	3.6	1.6	0.6	2.5	357	201	0	0	1	3	-156	43.6975	1	1	2	2	1	2
715	67	2	120	70	27	97	1	2	2	2	2	2	1	1	30	4.4	0.8	1.3	2.8	288	168	0	1	0	2	-120	41.6667	1	1	1	2	1	1
716	67	2	130	80	19	78	2	2	2	2	2	2	1	1	40	2.4	1	0.5	1.2	312	201	1	0	0	1	-111	35.5769	1	1	1	2	2	2
717	69	1	170	100	18	77	1	1	2	2	2	2	2	1	36	3.8	2.1	1	2	287	179	0	1	0	2	-108	37.6307	1	1	1	2	1	2
718	59	2	140	90	20	85	1	1	1	1	2	2	2	1	38	3	0.8	0.9	1.7	336	199	0	0	1	3	-137	40.7738	1	1	2	2	1	2
719	72	1	150	90	25	94	1	1	1	1	1	2	1	1	29	2.3	1	0.6	1.5	345	202	1	0	0	1	-143	41.4493	1	1	1	2	1	1
720	61	2	120	70	26	89	1	2	2	2	2	2	2	1	31	4	0.6	0.9	2.9	366	214	0	1	0	2	-152	41.5301	1	1	1	2	1	1
721	60	2	110	60	30	94	1	2	2	2	2	2	2	1	26	4.6	1.1	1	3.3	358	197	0	0	1	3	-161	44.9721	1	1	1	2	1	1
722	64	2	150	80	17	82	1	1	1	2	2	2	2	1	32	4.4	3.4	1	2.7	364	189	0	1	0	2	-175	48.0769	1	1	1	2	1	2
723	67	2	100	60	21	69	1	2	2	2	2	2	2	1	34	3.5	1.3	1	2.1	288	168	1	0	0	1	-120	41.6667	1	1	1	2	1	2
724	61	1	130	70	26	86	1	2	1	1	1	1	1	1	28	2.7	1.4	0.6	1.8	290	197	0	1	0	2	-93	32.069	1	1	1	2	1	1
725	59	2	160	90	29	96	1	1	2	1	2	2	2	1	25	4	2	0.6	2.7	267	198	0	0	1	3	-69	25.8427	1	1	2	2	1	1
726	81	1	170	100	20	78	2	1	1	2	1	2	2	1	40	3.5	1	0.9	2.3	411	231	1	0	0	1	-180	43.7956	1	1	1	2	2	2
727	62	2	160	90	20	73	1	1	1	2	2	2	2	1	39	3.9	1.2	0.5	2.8	356	176	0	1	0	2	-180	50.5618	1	1	1	2	1	2
728	57	1	150	90	24	87	1	1	2	2	2	2	2	2	37	3.7	1.1	1.1	2.2	298	169	0	0	1	3	-129	43.2886	1	1	2	2	1	2
729	60	2	160	90	21	86	1	1	1	1	1	2	2	1	32	2.3	0.7	0.9	1.2	359	190	0	1	0	2	-169	47.0752	1	1	1	2	1	2
730	47	2	120	70	23	80	1	2	2	2	2	2	2	1	35	3	0.6	0.9	1.9	388	231	1	0	0	1	-157	40.4639	1	1	2	2	1	2
731	64	1	150	90	19	85	1	1	1	2	2	1	1	1	37	4.4	4.8	1.6	2.7	288	159	0	0	1	3	-129	44.7917	1	1	1	2	1	2
732	65	2	110	70	20	82	1	2	2	2	2	2	2	1	37	5.2	1.2	1	3.7	399	179	1	0	0	1	-220	55.1378	1	1	1	2	1	2
733	80	2	120	80	28	96	2	2	1	1	1	2	2	1	31	4	1.4	1	2.6	416	236	0	0	1	3	-180	43.2692	1	1	1	2	1	1
